# Supplementary material
Source: PubMed Central journal article supplement (PMC5818776)

## Supplementary Online Content

**Welk B, McArthur E, Ordon M, Anderson KK, Hayward J, et al. Association of suicidality and depression with 5 $\alpha$ -reductase inhibitors [published online March 20, 2017]. *JAMA Intern Med*. doi:10.1001/jamainternmed.2017.0089**

**eTable 1.** STROBE/RECORD checklist

**eTable 2a.** Administrative data definitions used to define medical comorbidities

**eTable 2b.** Specific drugs included within each medication class

**eTable 2c.** Administrative data definitions used to define medical investigations and procedures

**eTable 4.** Coding definition for primary and secondary outcomes

**eTable 5.** Complete baselines for unmatched and matched cohorts

**eTable 6.** 5ARI medication utilisation details among the exposed cohort.

**eTable 7.** Significance of the potential effect modifiers of prior depression, and recent use of antidepressants on suicide between our matched cohorts of 5ARI users and non-users

**eTable 8.** Risk of suicide, self-harm and depression among men exposed to 5ARI medications compared to matched unexposed men after excluding matched pairs with evidence of prostate cancer

**eTable 9.** Risk of suicide, self-harm and depression among men exposed to 5ARI medications compared to matched unexposed men, with adjustment for the competing risk of non-suicide mortality

**eResults.** Example of SAS code used for primary analysis, and resulting raw output from SAS model

**eFigure 2.** Graph of Schoenfeld residuals for suicide, self-harm, and depression.

**eFigure 3.** Kaplan meier graphs of self-harm and depression.

This supplementary material has been provided by the authors to give readers additional information about their work.

## Supplemental Material

|                                                                                                                                                                                                          |    |
|----------------------------------------------------------------------------------------------------------------------------------------------------------------------------------------------------------|----|
| <b>eTable 1.</b> STROBE/RECORD checklist .....                                                                                                                                                           | 2  |
| <b>eTable 2a.</b> Administrative data definitions used to define medical comorbidities.....                                                                                                              | 6  |
| <b>eTable 2b.</b> Specific drugs included within each medication class .....                                                                                                                             | 10 |
| <b>eTable 2c.</b> Administrative data definitions used to define medical investigations and procedures.....                                                                                              | 14 |
| <b>eTable 4.</b> Coding definition for primary and secondary outcomes .....                                                                                                                              | 17 |
| <b>eTable 5.</b> Complete baselines for unmatched and matched cohorts.....                                                                                                                               | 19 |
| <b>eTable 6.</b> 5ARI medication utilisation details among the exposed cohort.....                                                                                                                       | 24 |
| <b>eTable 7.</b> Significance of the potential effect modifiers of prior depression, and recent use of antidepressants on suicide between our matched cohorts of 5ARI users and non-users. ....          | 25 |
| <b>eTable 8.</b> Risk of suicide, self-harm and depression among men exposed to 5ARI medications compared to matched unexposed men after excluding matched pairs with evidence of prostate cancer .....  | 26 |
| <b>eTable 9.</b> Risk of suicide, self-harm and depression among men exposed to 5ARI medications compared to matched unexposed men, with adjustment for the competing risk of non-suicide mortality..... | 27 |
| <b>eResults.</b> Example of SAS code used for primary analysis, and resulting raw output from SAS model.                                                                                                 | 28 |
| <b>eFigure 2.</b> Graph of Schoenfeld residuals for suicide, self-harm, and depression .....                                                                                                             | 31 |
| <b>eFigure 3.</b> Kaplan meier graphs of self-harm and depression .....                                                                                                                                  | 33 |

**eTable 1.** STROBE/RECORD checklist.

|                           | Item No. | STROBE items                                                                                                                                                                                                                                                             | Location in manuscript where items are reported                                                  | RECORD items                                                                                                                                                                                                                                                                                                                                                                                                                                       | Location in manuscript where items are reported                                                                                                                                                    |
|---------------------------|----------|--------------------------------------------------------------------------------------------------------------------------------------------------------------------------------------------------------------------------------------------------------------------------|--------------------------------------------------------------------------------------------------|----------------------------------------------------------------------------------------------------------------------------------------------------------------------------------------------------------------------------------------------------------------------------------------------------------------------------------------------------------------------------------------------------------------------------------------------------|----------------------------------------------------------------------------------------------------------------------------------------------------------------------------------------------------|
| <b>Title and abstract</b> |          |                                                                                                                                                                                                                                                                          |                                                                                                  |                                                                                                                                                                                                                                                                                                                                                                                                                                                    |                                                                                                                                                                                                    |
|                           | 1        | <p>(a) Indicate the study's design with a commonly used term in the title or the abstract</p> <p>(b) Provide in the abstract an informative and balanced summary of what was done and what was found</p>                                                                 | <p><i>Title, Abstract (Design)</i></p> <p><i>Abstract</i></p>                                    | <p>RECORD 1.1: The type of data used should be specified in the title or abstract. When possible, the name of the databases used should be included.</p> <p>RECORD 1.2: If applicable, the geographic region and timeframe within which the study took place should be reported in the title or abstract.</p> <p>RECORD 1.3: If linkage between databases was conducted for the study, this should be clearly stated in the title or abstract.</p> | <p><i>Abstract (Design, Setting). Note: due to numerous data sources they are only fully listed in Methods (Data Sources)</i></p> <p><i>Abstract (Setting)</i></p> <p><i>Abstract (Design)</i></p> |
| <b>Introduction</b>       |          |                                                                                                                                                                                                                                                                          |                                                                                                  |                                                                                                                                                                                                                                                                                                                                                                                                                                                    |                                                                                                                                                                                                    |
| Background rationale      | 2        | Explain the scientific background and rationale for the investigation being reported                                                                                                                                                                                     | <i>Introduction</i>                                                                              |                                                                                                                                                                                                                                                                                                                                                                                                                                                    |                                                                                                                                                                                                    |
| Objectives                | 3        | State specific objectives, including any prespecified hypotheses                                                                                                                                                                                                         | <i>Objective: Introduction (last paragraph), Hypothesis: Methods (study outcomes)</i>            |                                                                                                                                                                                                                                                                                                                                                                                                                                                    |                                                                                                                                                                                                    |
| <b>Methods</b>            |          |                                                                                                                                                                                                                                                                          |                                                                                                  |                                                                                                                                                                                                                                                                                                                                                                                                                                                    |                                                                                                                                                                                                    |
| Study Design              | 4        | Present key elements of study design early in the paper                                                                                                                                                                                                                  | <i>Methods (design and setting)</i>                                                              |                                                                                                                                                                                                                                                                                                                                                                                                                                                    |                                                                                                                                                                                                    |
| Setting                   | 5        | Describe the setting, locations, and relevant dates, including periods of recruitment, exposure, follow-up, and data collection                                                                                                                                          | <i>Methods (design and setting, data sources, patient population)</i>                            |                                                                                                                                                                                                                                                                                                                                                                                                                                                    |                                                                                                                                                                                                    |
| Participants              | 6        | <p>(a) <i>Cohort study</i> - Give the eligibility criteria, and the sources and methods of selection of participants. Describe methods of follow-up</p> <p>(b) <i>Cohort study</i> - For matched studies, give matching criteria and number of exposed and unexposed</p> | <p><i>Methods (patient population)</i></p> <p><i>Methods (patient population), eFigure 1</i></p> | <p>RECORD 6.1: The methods of study population selection (such as codes or algorithms used to identify subjects) should be listed in detail. If this is not possible, an explanation should be provided.</p> <p>RECORD 6.2: Any validation studies of the codes or algorithms used to select the population should be referenced. If validation was</p>                                                                                            | <p><i>Methods (patient population)</i></p> <p><i>Reference: Levy AR, O'Brien BJ, Sellors C, et al. Coding accuracy of administrative drug</i></p>                                                  |

|                                  |    |                                                                                                                                                                                                                                                                                                                                                                     |                                                                                                                                                                                                                          |                                                                                                                                                                                                                                                                                                                                                     |                                                                                                                                                                                                    |
|----------------------------------|----|---------------------------------------------------------------------------------------------------------------------------------------------------------------------------------------------------------------------------------------------------------------------------------------------------------------------------------------------------------------------|--------------------------------------------------------------------------------------------------------------------------------------------------------------------------------------------------------------------------|-----------------------------------------------------------------------------------------------------------------------------------------------------------------------------------------------------------------------------------------------------------------------------------------------------------------------------------------------------|----------------------------------------------------------------------------------------------------------------------------------------------------------------------------------------------------|
|                                  |    |                                                                                                                                                                                                                                                                                                                                                                     |                                                                                                                                                                                                                          | <p>conducted for this study and not published elsewhere, detailed methods and results should be provided.</p> <p>RECORD 6.3: If the study involved linkage of databases, consider use of a flow diagram or other graphical display to demonstrate the data linkage process, including the number of individuals with linked data at each stage.</p> | <p><i>claims in the Ontario Drug Benefit database. Can J Clin Pharmacol 2003;10:67–71.</i></p> <p><i>Methods (design and setting). All individuals were successfully linked in this study.</i></p> |
| Variables                        | 7  | Clearly define all outcomes, exposures, predictors, potential confounders, and effect modifiers. Give diagnostic criteria, if applicable.                                                                                                                                                                                                                           | <i>Methods (patient population, study outcomes)</i>                                                                                                                                                                      | RECORD 7.1: A complete list of codes and algorithms used to classify exposures, outcomes, confounders, and effect modifiers should be provided. If these cannot be reported, an explanation should be provided.                                                                                                                                     | <p><i>Covariates/ confounders: eTable 2</i></p> <p><i>Outcomes/effect modifiers: eTable 4</i></p>                                                                                                  |
| Data sources/ measurement        | 8  | For each variable of interest, give sources of data and details of methods of assessment (measurement). Describe comparability of assessment methods if there is more than one group                                                                                                                                                                                | <p><i>Covariates/ confounders: eTable 2,</i></p> <p><i>Outcomes/ effect modifiers: eTable 4</i></p>                                                                                                                      |                                                                                                                                                                                                                                                                                                                                                     |                                                                                                                                                                                                    |
| Bias                             | 9  | Describe any efforts to address potential sources of bias                                                                                                                                                                                                                                                                                                           | <i>Methods (patient population)</i>                                                                                                                                                                                      |                                                                                                                                                                                                                                                                                                                                                     |                                                                                                                                                                                                    |
| Study size                       | 10 | Explain how the study size was arrived at                                                                                                                                                                                                                                                                                                                           | NA                                                                                                                                                                                                                       |                                                                                                                                                                                                                                                                                                                                                     |                                                                                                                                                                                                    |
| Quantitative variables           | 11 | Explain how quantitative variables were handled in the analyses. If applicable, describe which groupings were chosen, and why                                                                                                                                                                                                                                       | <i>Methods (patient population)</i>                                                                                                                                                                                      |                                                                                                                                                                                                                                                                                                                                                     |                                                                                                                                                                                                    |
| Statistical methods              | 12 | <p>(a) Describe all statistical methods, including those used to control for confounding</p> <p>(b) Describe any methods used to examine subgroups and interactions</p> <p>(c) Explain how missing data were addressed</p> <p>(d) <i>Cohort study</i> - If applicable, explain how loss to follow-up was addressed</p> <p>(e) Describe any sensitivity analyses</p> | <p><i>Methods (statistical analysis)</i></p> <p><i>Methods (statistical analysis)</i></p> <p><i>Methods (data sources)</i></p> <p><i>Methods (statistical analysis)</i></p> <p><i>Methods (statistical analysis)</i></p> |                                                                                                                                                                                                                                                                                                                                                     |                                                                                                                                                                                                    |
| Data access and cleaning methods |    |                                                                                                                                                                                                                                                                                                                                                                     |                                                                                                                                                                                                                          | RECORD 12.1: Authors should describe the extent to which                                                                                                                                                                                                                                                                                            | <i>Acknowledgements: Contributors</i>                                                                                                                                                              |

|                  |    |                                                                                                                                                                                                                                                                                                                                                         |                                                                                     |                                                                                                                                                                                                                                                                                                                    |                                     |
|------------------|----|---------------------------------------------------------------------------------------------------------------------------------------------------------------------------------------------------------------------------------------------------------------------------------------------------------------------------------------------------------|-------------------------------------------------------------------------------------|--------------------------------------------------------------------------------------------------------------------------------------------------------------------------------------------------------------------------------------------------------------------------------------------------------------------|-------------------------------------|
|                  |    |                                                                                                                                                                                                                                                                                                                                                         |                                                                                     | the investigators had access to the database population used to create the study population.<br><br>RECORD 12.2: Authors should provide information on the data cleaning methods used in the study.                                                                                                                | <i>eFigure 1</i>                    |
| Linkage          |    |                                                                                                                                                                                                                                                                                                                                                         |                                                                                     | RECORD 12.3: State whether the study included person-level, institutional-level, or other data linkage across two or more databases. The methods of linkage and methods of linkage quality evaluation should be provided.                                                                                          | <i>Methods (design and setting)</i> |
| <b>Results</b>   |    |                                                                                                                                                                                                                                                                                                                                                         |                                                                                     |                                                                                                                                                                                                                                                                                                                    |                                     |
| Participants     | 13 | (a) Report the numbers of individuals at each stage of the study ( <i>e.g.</i> , numbers potentially eligible, examined for eligibility, confirmed eligible, included in the study, completing follow-up, and analysed)<br><br>(b) Give reasons for non-participation at each stage.<br><br>(c) Consider use of a flow diagram                          | <i>eFigure 1</i><br><br><i>eFigure 1</i><br><br><i>eFigure 1</i>                    | RECORD 13.1: Describe in detail the selection of the persons included in the study ( <i>i.e.</i> , study population selection) including filtering based on data quality, data availability and linkage. The selection of included persons can be described in the text and/or by means of the study flow diagram. | <i>eFigure 1</i>                    |
| Descriptive data | 14 | (a) Give characteristics of study participants ( <i>e.g.</i> , demographic, clinical, social) and information on exposures and potential confounders<br><br>(b) Indicate the number of participants with missing data for each variable of interest<br><br>(c) <i>Cohort study</i> - summarise follow-up time ( <i>e.g.</i> , average and total amount) | <i>Table 1, eTable 5</i><br><br><i>Methods (data sources)</i><br><br><i>Table 2</i> |                                                                                                                                                                                                                                                                                                                    |                                     |
| Outcome data     | 15 | <i>Cohort study</i> - Report numbers of outcome events or summary measures over time                                                                                                                                                                                                                                                                    | <i>Table 2</i>                                                                      |                                                                                                                                                                                                                                                                                                                    |                                     |
| Main results     | 16 | (a) Give unadjusted estimates and, if applicable, confounder-adjusted estimates and their precision ( <i>e.g.</i> , 95% confidence interval). Make clear which confounders were adjusted for and why they were included                                                                                                                                 | <i>Table 2</i>                                                                      |                                                                                                                                                                                                                                                                                                                    |                                     |

|                                                           |    |                                                                                                                                                                                                   |                                               |                                                                                                                                                                                                                                                                                                          |                                               |
|-----------------------------------------------------------|----|---------------------------------------------------------------------------------------------------------------------------------------------------------------------------------------------------|-----------------------------------------------|----------------------------------------------------------------------------------------------------------------------------------------------------------------------------------------------------------------------------------------------------------------------------------------------------------|-----------------------------------------------|
|                                                           |    | (b) Report category boundaries when continuous variables were categorized<br><br>(c) If relevant, consider translating estimates of relative risk into absolute risk for a meaningful time period | NA<br><br><i>Table 2</i>                      |                                                                                                                                                                                                                                                                                                          |                                               |
| Other analyses                                            | 17 | Report other analyses done—e.g., analyses of subgroups and interactions, and sensitivity analyses                                                                                                 | <i>Results, Table 3</i>                       |                                                                                                                                                                                                                                                                                                          |                                               |
| <b>Discussion</b>                                         |    |                                                                                                                                                                                                   |                                               |                                                                                                                                                                                                                                                                                                          |                                               |
| Key results                                               | 18 | Summarise key results with reference to study objectives                                                                                                                                          | <i>Discussion (principle findings)</i>        |                                                                                                                                                                                                                                                                                                          |                                               |
| Limitations                                               | 19 | Discuss limitations of the study, taking into account sources of potential bias or imprecision. Discuss both direction and magnitude of any potential bias                                        | <i>Discussion (strengths and limitations)</i> | RECORD 19.1: Discuss the implications of using data that were not created or collected to answer the specific research question(s). Include discussion of misclassification bias, unmeasured confounding, missing data, and changing eligibility over time, as they pertain to the study being reported. | <i>Discussion (strengths and limitations)</i> |
| Interpretation                                            | 20 | Give a cautious overall interpretation of results considering objectives, limitations, multiplicity of analyses, results from similar studies, and other relevant evidence                        | <i>Discussion (practise implications)</i>     |                                                                                                                                                                                                                                                                                                          |                                               |
| Generalisability                                          | 21 | Discuss the generalisability (external validity) of the study results                                                                                                                             | <i>Discussion (practise implications)</i>     |                                                                                                                                                                                                                                                                                                          |                                               |
| <b>Other Information</b>                                  |    |                                                                                                                                                                                                   |                                               |                                                                                                                                                                                                                                                                                                          |                                               |
| Funding                                                   | 22 | Give the source of funding and the role of the funders for the present study and, if applicable, for the original study on which the present article is based                                     | <i>Acknowledgements</i>                       |                                                                                                                                                                                                                                                                                                          |                                               |
| Accessibility of protocol, raw data, and programming code |    | ..                                                                                                                                                                                                |                                               | RECORD 22.1: Authors should provide information on how to access any supplemental information such as the study protocol, raw data, or programming code.                                                                                                                                                 | <i>eResults, Acknowledgements</i>             |

**eTable 2a.** Administrative data definitions used to define medical comorbidities. A 5 year lookback window relative to the index date was used.

| Variable                        | Database          | Codes                                                                                                                                                                                                                                                                                                              |
|---------------------------------|-------------------|--------------------------------------------------------------------------------------------------------------------------------------------------------------------------------------------------------------------------------------------------------------------------------------------------------------------|
| 1. Acute Urinary Retention      | CIHI-DAD          | ICD-9: 7882                                                                                                                                                                                                                                                                                                        |
|                                 | CIHI-SDS<br>NACRS | ICD-10: R33, R3912                                                                                                                                                                                                                                                                                                 |
| 2. Acute kidney injury          | CIHI-DAD          | ICD-9: 584<br>ICD-10: N17                                                                                                                                                                                                                                                                                          |
|                                 | CIHI-DAD<br>OHIP  | ICD-9: 3030, 3039, 3050<br>ICD-10: K70, G721, I426, K292, F10, G621, G312, Z714, K860, T510, E244, T519, E512, X45, X65, Y15, Y573, Z502, Z721                                                                                                                                                                     |
| 3. Alcoholism                   | CIHI-DAD          | ICD-9: 30000, 30001, 30002, 30009, 30020, 30022, 30023, 30029, 3004, 3083, 3089, 3090, 30981, 30989                                                                                                                                                                                                                |
|                                 | CIHI-SDS          | ICD-10: F400, F401, F402, F408, F409, F410, F411, F412, F413, F418, F419, F430, F431, F432, F438, F439                                                                                                                                                                                                             |
| 4. Anxiety                      | CIHI-DAD          | ICD-9: 4273                                                                                                                                                                                                                                                                                                        |
|                                 | CIHI-SDS          | ICD-10: I48                                                                                                                                                                                                                                                                                                        |
| 5. Atrial fibrillation/flutter  | CIHI-DAD          | ICD-9: 600                                                                                                                                                                                                                                                                                                         |
|                                 | CIHI-SDS<br>OHIP  | ICD-10: N40<br>OHIP Diagnostic Code: 600                                                                                                                                                                                                                                                                           |
| 6. Benign Prostatic Hyperplasia | CIHI-DAD          | ICD-9: 29600, 29640, 29651, 29653, 29660, 2967, 29689                                                                                                                                                                                                                                                              |
|                                 | CIHI-SDS          | ICD-10: F300, F301, F302, F308, F309, F310, F311, F312, F313, F314, F315, F316, F317, F318, F319                                                                                                                                                                                                                   |
| 7. Bipolar disorder             | CIHI-DAD          | ICD-9: 154, 2303, 2304, 2307                                                                                                                                                                                                                                                                                       |
|                                 | CIHI-SDS          | ICD-10: C18, C19, C20, D010, D011, D012<br>OHIP Diagnostic Code: 154                                                                                                                                                                                                                                               |
| 8. Bowel Cancer                 | CIHI-DAD          | ICD-9: 1910, 1911, 1912, 1913, 1914, 1915, 1916, 1917, 1918, 1919, 1920, 1921, 1922, 1923, 1928, 1929, 2375, 2376, 2379, 2370, 2371, 23712, 2373, 2374, 1983, 1984                                                                                                                                                 |
|                                 | OHIP              | ICD-10: C70, C71, C72, D42, D43, D479, C793, C794                                                                                                                                                                                                                                                                  |
| 9. Brain tumor                  | CIHI-DAD          | ICD-9: 174, 175, 2330                                                                                                                                                                                                                                                                                              |
|                                 | CIHI-SDS          | ICD-10: C50, D05<br>OHIP Diagnostic Code: 174, 175                                                                                                                                                                                                                                                                 |
| 10. Breast Cancer               | CIHI-DAD          | ICD-9: 4030, 4031, 4039, 4040, 4041, 4049, 585, 586, 5888, 5889, 2504                                                                                                                                                                                                                                              |
|                                 | OHIP              | ICD-10: E102, E112, E132, E142, I12, I13, N08, N18, N19<br>OHIP Diagnostic Code: 403, 585                                                                                                                                                                                                                          |
| 11. Chronic kidney disease      | CIHI-DAD          | ICD-9: 4561, 4562, 070, 5722, 5723, 5724, 5728, 573, 7824, V026, 2750, 2751, 7891, 7895, 571                                                                                                                                                                                                                       |
|                                 | OHIP              | ICD-10: B16, B17, B18, B19, I85, R17, R18, R160, R162, B942, Z225, E831, E830, K70, K713, K714, K715, K717, K721, K729, K73, K74, K753, K754, K758, K759, K76, K77<br>OHIP Diagnostic Code: 571, 573, 070,<br>OHIP Fee Code: Z551, Z554                                                                            |
| 12. Chronic liver disease       | CIHI-DAD          | ICD-9: 491, 492, 493, 494, 495, 496, 500, 501, 502, 503, 504, 505, 5064, 5069, 5081, 515, 516, 517, 5185, 5188, 5198, 5199, 4168, 4169                                                                                                                                                                             |
|                                 | OHIP              | ICD-10: I272, I278, I279, J40, J41, J42, J43, J44, J45, J47, J60, J61, J62, J63, J64, J65, J66, J67, J68, J701, J703, J704, J708, J709, J82, J84, J92, J941, J949, J953, J961, J969, J984, J988, J989, J99<br>OHIP Diagnostic Code: 491, 492, 493, 494, 496, 501, 502, 515, 518, 519,<br>OHIP Fee Code: J689, J889 |
| 13. Chronic lung disease        | CIHI-DAD          | ICD-9: 425, 5184, 514, 428                                                                                                                                                                                                                                                                                         |
|                                 | OHIP              | ICD-10: I500, I501, I509, I255, J81<br>CCP: 4961, 4962, 4963, 4964<br>CCI: 1HP53, 1HP55, 1HZ53GRFR, 1HZ53LAFR, 1HZ53SYFR<br>OHIP Diagnostic Code: 428,<br>OHIP Fee Code: R701, R702, Z429                                                                                                                          |
| 14. Congestive heart failure    | CIHI-DAD          | ICD-9: 410, 411, 412, 413, 414, 4292, 4296, 4297                                                                                                                                                                                                                                                                   |
|                                 | OHIP              |                                                                                                                                                                                                                                                                                                                    |

|                                                                                                                              |                               |                                                                                                                                                                                                                                                                                                                                                                                                                                                                                                                                                                                                                                                                                                                                                                                                                                                                                                                                                                                                                                                                                                                                                                                                                                                                                                                                                                                    |
|------------------------------------------------------------------------------------------------------------------------------|-------------------------------|------------------------------------------------------------------------------------------------------------------------------------------------------------------------------------------------------------------------------------------------------------------------------------------------------------------------------------------------------------------------------------------------------------------------------------------------------------------------------------------------------------------------------------------------------------------------------------------------------------------------------------------------------------------------------------------------------------------------------------------------------------------------------------------------------------------------------------------------------------------------------------------------------------------------------------------------------------------------------------------------------------------------------------------------------------------------------------------------------------------------------------------------------------------------------------------------------------------------------------------------------------------------------------------------------------------------------------------------------------------------------------|
| <b>15. Coronary artery disease or angina</b>                                                                                 | OHIP                          | ICD-10: I20, I21, I22, I23, I24, I25, Z955, Z958, Z959, R931, T822<br>CCP: 4801, 4802, 4803, 4804, 4805, 481, 482, 483<br>CCI: 1IJ26, 1IJ27, 1IJ54, 1IJ57, 1IJ50, 1IJ76<br>OHIP Diagnostic Code: 410, 412, 413,<br>OHIP Fee Code: R741, R742, R743, G298, E646, E651, E652, E654, E655,<br>G262, Z434, Z448                                                                                                                                                                                                                                                                                                                                                                                                                                                                                                                                                                                                                                                                                                                                                                                                                                                                                                                                                                                                                                                                        |
| <b>16. Cranial head trauma</b>                                                                                               | CIHI-DAD<br>CIHI-SDS<br>NACRS | ICD-9: 509, 9510, 9511, 9512, 9513, 9514, 9515, 9516, 9518, 9519, 850,<br>8500, 8510, 8511, 85181, 85191, 8520, 85201, 8521, 85221, 85241, 8530,<br>85301, 8531, 85311, 8540, 85401, 8541, 85411, 80300, 9251, 8730, 87200,<br>8738, 85400, 85409, 87261, 90089, 95909<br><br>ICD-10: S04, S06, S07, S08, S09                                                                                                                                                                                                                                                                                                                                                                                                                                                                                                                                                                                                                                                                                                                                                                                                                                                                                                                                                                                                                                                                      |
| <b>17. Dementia</b>                                                                                                          | CIHI-DAD<br>OHIP              | ICD-9: 2900, 2901, 2903, 2904, 2908, 2909, 2948, 2949, 3310, 3311, 3312,<br>2941, 797<br>ICD-10: F065, F066, F068, F069, F09, F00, F01, F02, F03, F051, G30, G31,<br>R54<br>OHIP Diagnostic Code: 290, 331, 797<br>See primary outcome tables                                                                                                                                                                                                                                                                                                                                                                                                                                                                                                                                                                                                                                                                                                                                                                                                                                                                                                                                                                                                                                                                                                                                      |
| <b>18. Depression</b>                                                                                                        |                               |                                                                                                                                                                                                                                                                                                                                                                                                                                                                                                                                                                                                                                                                                                                                                                                                                                                                                                                                                                                                                                                                                                                                                                                                                                                                                                                                                                                    |
| <b>19. Diabetes mellitus</b>                                                                                                 | ODB                           | Insulin (Isophane) Beef & Pork, Insulin (Isophane) Human Biosynthetic,<br>Insulin (Isophane) Human Semi-Synthetic, Insulin (Isophane) Pork, Insulin<br>(Neutral) Human Semi-Synthetic, Insulin (Neutral) Pork, Insulin (Protamine<br>Zinc) Beef & Pork, Insulin (Sulfated) Beef, Insulin (Zinc) Beef, Insulin (Zinc)<br>Beef & Pork, Insulin (Zinc) Human Biosynthetic, Insulin (Zinc) Human Semi-<br>Synthetic, Insulin (Zinc) Pork, Insulin Aspart, Insulin Aspart & Insulin Aspart<br>Protamine, Insulin Detemir, Insulin Glargine, Insulin Human Biosynthetic,<br>Insulin Human Semi-Synthetic, Insulin Injection Pork, Insulin Isophane<br>Injection Pork, Insulin Lispro, Acarbose, Acetohexamide, Chlorpropamide,<br>Gliclazide, Glimepiride, Glyburide, Metformin HCL, Nateglinide,<br>Pioglitazone HCL, Repaglinide, Rosiglitazone Male, Sitagliptin Phosphate<br>Monohydrate, Tolbutamide                                                                                                                                                                                                                                                                                                                                                                                                                                                                                |
| <b>20. Encephalitis/atypical CNS disorders/Multi-system atrophy/Progressive supranuclear palsy/Primary lateral sclerosis</b> | CIHI-DAD<br>CIHI-SDS          | ICD-9: 0620, 0621, 0622, 0623, 0624, 0625, 0628, 0629, 0461, 0462, 0463,<br>0468, 0469, 0630, 0632, 0638, 0639, 0499, 0498, 064, 0470, 0471, 0478,<br>0479, 048, 0490, 0491, 0498, 0499<br><br>ICD-10: A81, A83, A84, A85, A86, A87, A88, A89                                                                                                                                                                                                                                                                                                                                                                                                                                                                                                                                                                                                                                                                                                                                                                                                                                                                                                                                                                                                                                                                                                                                      |
| <b>21. Hypertension</b>                                                                                                      | ODB                           | Acebutolol HCL, Aliskiren Fumarate, Amlodipine Besylate, Amlodipine<br>Besylate & Atorvastatin, Atenolol, Atenolol & Chlorthalidone, Betaxolol<br>HCL, Bisoprolol Fumarate, Brimonidine Tartrate & Timolol Maleate,<br>Brinzolamide & Timolol Maleate, Bumetanide, Candesartan Cilexetil,<br>Candesartan Cilexetil & Hydrochlorothiazide, Captopril, Carvedilol,<br>Chlorthalidone, Diltiazem HCL, Enalapril Sodium, Eprosartan Mesylate,<br>Eprosartan Mesylate & Hydrochlorothiazide, Erythryl Tetranitrate,<br>Felodipine, Flunarizine HCL, Hydralazine HCL, Hydrochlorothiazide,<br>Indapamide, Irbesartan, Irbesartan & Hydrochlorothiazide, Labetalol HCL,<br>Lisinopril, Losartan Potassium, Losartan Potassium & Hydrochlorothiazide,<br>Metolazone, Metoprolol Tartrate, Minoxidil, Nadolol, Nicardipine HCL,<br>Nifedipine, Nimodipine, Olmesartan Medoxomil, Olmesartan Medoxomil &<br>Hydrochlorothiazide, Oxprenolol HCL, Phenoxybenzamine, Pindolol,<br>Pindolol & Hydrochlorothiazide, Propranolol HCL, Propranolol HCL &<br>Hydrochlorothiazide, Spironolactone, Spironolactone &<br>Hydrochlorothiazide, Telmisartan, Telmisartan & Hydrochlorothiazide,<br>Timolol Maleate, Timolol Maleate & Hydrochlorothiazide, Timolol Maleate<br>& Travoprost, Triamterene, Triamterene & Hydrochlorothiazide, Valsartan,<br>Valsartan & Hydrochlorothiazide, Verapamil HCL |
| <b>22. Lung cancer</b>                                                                                                       | CIHI-DAD<br>OHIP              | ICD9: 162, 2312<br>ICD-10: C34, D022<br>OHIP Diagnostic Code: 162                                                                                                                                                                                                                                                                                                                                                                                                                                                                                                                                                                                                                                                                                                                                                                                                                                                                                                                                                                                                                                                                                                                                                                                                                                                                                                                  |
| <b>23. Melanoma</b>                                                                                                          | CIHI-DAD<br>OHIP              | ICD-9: 172<br>ICD-10: C43<br>OHIP Diagnostic Code: 172                                                                                                                                                                                                                                                                                                                                                                                                                                                                                                                                                                                                                                                                                                                                                                                                                                                                                                                                                                                                                                                                                                                                                                                                                                                                                                                             |
| <b>24. Migraine</b>                                                                                                          | CIHI-DAD                      | ICD-9: 3460, 3461, 3462, 3468, 3469, 30781, 34620, 7840                                                                                                                                                                                                                                                                                                                                                                                                                                                                                                                                                                                                                                                                                                                                                                                                                                                                                                                                                                                                                                                                                                                                                                                                                                                                                                                            |



|                                                |                                       |          |                                                                                                                                                                                                                                                                                                                                                                                                                                                                                      |
|------------------------------------------------|---------------------------------------|----------|--------------------------------------------------------------------------------------------------------------------------------------------------------------------------------------------------------------------------------------------------------------------------------------------------------------------------------------------------------------------------------------------------------------------------------------------------------------------------------------|
|                                                |                                       | CIHI-SDS |                                                                                                                                                                                                                                                                                                                                                                                                                                                                                      |
| <b>25. Multiple sclerosis</b>                  | NACRS<br>CIHI-DAD<br>CIHI-SDS<br>OHIP |          | ICD-10: G43, G44<br>ICD-9: 340<br>ICD-10: G35<br>OHIP Diagnostic Code: 340 [ $\geq 7$ contacts for code 340]                                                                                                                                                                                                                                                                                                                                                                         |
| <b>26. Obesity</b>                             | CIHI-DAD<br>OHIP                      |          | ICD-9: 2780<br>ICD-10: E660, E661, E662, E668, E669<br>OHIP Diagnostic Code: 278                                                                                                                                                                                                                                                                                                                                                                                                     |
| <b>27. Osteoporosis</b>                        | CIHI-DAD<br>CIHI-SDS<br>OHIP          |          | ICD-9: 733<br>ICD-10: M80, M81<br>OHIP Diagnostic Code: 733                                                                                                                                                                                                                                                                                                                                                                                                                          |
| <b>28. Peripheral vascular disease</b>         | CIHI-DAD<br>OHIP                      |          | ICD-9: 4402, 4408, 4409, 5571, 4439, 444<br>ICD-10: I700, I702, I708, I709, I731, I738, I739, K551<br>CCP: 5125, 5126, 5129, 5159, 5014, 5016, 5018, 5028, 5038<br>CCI: 1KA76, 1KA50, 1KE76, 1KG50, 1KG57, 1KG76MI, 1KG87, 1IA87LA, 1IB87LA, 1IC87LA, 1ID87, 1KA87LA, 1KE57<br>OHIP Fee Code: R787, R780, R797, R804, R809, R875, R815, R936, R783, R784, R785, E626, R814, R786, R937, R860, R861, R855, R856, R933, R934, R791, E672, R794, R813, R867, E649                       |
| <b>29. Personality disorder</b>                | CIHI-DAD<br>CIHI-SDS                  |          | ICD-9: 30016, 3010, 30120, 3013, 3014, 30150, 30151, 3016, 3017, 30182, 30189, 3019, 3022, 3023, 3023, 3024, 30250, 3026, 30281, 30282, 30284, 30289, 3029, 31230, 31231, 31232, 31233, 31234, 31239<br>ICD-10: F600, F601, F602, F603, F604, F605, F606, F607, F608, F609, F61, F620, F621, F628, F629, F630, F631, F632, F633, F638, F639, F640, F641, F642, F648, F649, F650, F651, F652, F653, F654, F655, F656, F658, F659, F660, F661, F662, F668, F669, F680, F681, F688, F69 |
| <b>30. Prostate Cancer</b>                     | OHIP                                  |          | ICD-9: 185, 2334<br>ICD-10: C61, D075<br>OHIP Diagnostic Code: 185                                                                                                                                                                                                                                                                                                                                                                                                                   |
| <b>31. Renal cancer</b>                        | CIHI-DAD<br>OHIP                      |          | ICD-9: 189<br>ICD-10: C64<br>OHIP Diagnostic Code: 189                                                                                                                                                                                                                                                                                                                                                                                                                               |
| <b>32. Rheumatoid arthritis</b>                | CIHI-DAD<br>OHIP                      |          | ICD-9: 714<br>ICD-10: M05, M06<br>OHIP Diagnostic Code: 714                                                                                                                                                                                                                                                                                                                                                                                                                          |
| <b>33. Schizophrenia/delusional disorders</b>  | CIHI-DAD<br>CIHI-SDS                  |          | ICD-9: 29500, 29510, 29520, 29530, 29540, 29550, 29560, 29570, 29580, 29590, 2971, 2973, 2978, 2979, 2983, 2984, 2988, 2989<br>ICD-10: F200, F201, F202, F203, F204, F205, F206, F208, F209, F21, F220, F228, F229, F230, F231, F232, F233, F238, F239, F24, F250, F251, F252, F258, F259, F28, F29                                                                                                                                                                                  |
| <b>34. Seizure</b>                             | CIHI-DAD                              |          | ICD-9: 345, 7803<br>ICD-10: G40, G41, R560, R568                                                                                                                                                                                                                                                                                                                                                                                                                                     |
| <b>35. Self-harm</b>                           | CIHI-DAD<br>NACRS<br>OMHRS            |          | See Table 2c (primary outcomes)                                                                                                                                                                                                                                                                                                                                                                                                                                                      |
| <b>36. Stroke or TIA</b>                       | CIHI-DAD                              |          | ICD-9: 430, 431, 432, 434, 435, 436, 3623<br>ICD-10: I62, I630, I631, I632, I633, I634, I635, I638, I639, I64, H341, I600, I601, I602, I603, I604, I605, I606, I607, I609, I61, G450, G451, G452, G453, G458, G459, H340<br>ICD-9: 2920, 29211, 2922, 29283, 29289, 2929, 30400, 30410, 30420, 30430, 30440, 30453, 30460, 30490, 30520, 30530, 30540, 30550, 30560, 30570, 30590                                                                                                    |
| <b>37. Substance abuse (excluding alcohol)</b> | CIHI-DAD<br>CIHI-SDS<br>NACRS         |          | ICD-10: F110, F111, F112, F113, F114, F115, F116, F117, F118, F119, F120, F121, F122, F123, F124, F125, F126, F127, F128, F129, F130, F131, F132, F133, F134, F135, F136, F137, F138, F139, F140, F141, F142, F143, F144, F145, F146, F147, F148, F149, F150, F151, F152, F153, F154, F155, F156, F157, F158, F159, F160, F161, F162, F163, F164, F165, F166, F167, F168,                                                                                                            |

F169, F180, F181, F182, F183, F184, F185, F186, F187, F188, F189, F190, F191, F192, F193, F194, F195, F196, F197, F198

**38. Superficial head trauma**

CIHI-DAD  
CIHI-SDS  
NACRS

ICD-9: 9180, 9108, 9109, 8700, 87200, 87210, 8730, 8731, 87320, 87330, 87341, 87343, 87351, 87353, 8738, 8739, 80001, 80051, 80101, 80151, 8020, 8021, 80220, 80224, 80228, 80229, 80230, 80234, 80238, 80239, 8024, 8025, 8026, 8027, 8028, 8029, 80300, 80350, 8736, 87363, 8737, 80401, 80451, 8300, 83961, 83969, 8481, 8488, 87363, 8703, 8710, 8711, 8713, 8715, 8717, 9212, 9213, 9219  
ICD-10: S00, S01, S02, S03, S05

GP visit code:

OHIP Fee Code: A001, A003, A004, A007, A008, A263, A264, A888, A900, A901 K004, K005, 006, K007, K013, K022, K023, K032, K033, K037, K623

With

OHIP Diagnostic Code: 599

**39. Urinary tract infection**

CIHI-DAD  
CIHI-SDS  
OHIP  
NACRS

OR

Urology Visit in the past year

With

OHIP Diagnostic Code: 599

OR

Evidence of any UTI code below:

ICD-9: 58381, 58390, 59001, 59020, 59080, 59081, 59090, 59500, 59540, 59581, 59589, 59590, 59700, 59780, 59900, 59910, 59911, 99664, 99665

ICD-10: N10, N110, N111, N118, N119, N12, N136, N151, N159, N160, N300, N308, N309, N340, N390, T835

---

Data sources included CIHI-DAD (inpatient discharge abstracts), CIHI-SDS (same day surgeries), NACRS (National Ambulatory Care Reporting System), OHIP (physician billings and diagnosis descriptions), ODB (universal medication coverage), and OMHRS (Ontario Mental Health Reporting System). CIHI-DAD used ICD-10 (for diagnostic coding) and CCI coding (for interventions) after April 1, 2002, and ICD-9/CCP coding prior to this. Specific ICD 9/10 and CCP/CCI codes, and medication classes used to define hypertension and diabetes are defined above. The presence of any data element was considered evidence of the comorbidity. A look-back window of 5 years prior to index date was used for all conditions, aside from hypertension and diabetes (which used a 6 month look-back period due to the use of medications to define these conditions).

**eTable 2b.** Specific drugs included within each medication class. Approximately 7,400 individual Drug Identification Numbers (DINs) were used to identify relevant brands and doses. A 6 month lookback window relative to the index date was used.

| Medication class                        | Medications                                                                                                                                                                                                                                                                                                                                                                                                                                                                                                                                                                                                                                                                                                                                                                                                                                                                                                                                                                                                                                                                                                                                                                                                                                                                                                                                                                                                                                                                                                                                                                                                                                                                                                                                                                                                                                                                                                                                                                                                                                                                                                                                                                                                                                                                                                          |
|-----------------------------------------|----------------------------------------------------------------------------------------------------------------------------------------------------------------------------------------------------------------------------------------------------------------------------------------------------------------------------------------------------------------------------------------------------------------------------------------------------------------------------------------------------------------------------------------------------------------------------------------------------------------------------------------------------------------------------------------------------------------------------------------------------------------------------------------------------------------------------------------------------------------------------------------------------------------------------------------------------------------------------------------------------------------------------------------------------------------------------------------------------------------------------------------------------------------------------------------------------------------------------------------------------------------------------------------------------------------------------------------------------------------------------------------------------------------------------------------------------------------------------------------------------------------------------------------------------------------------------------------------------------------------------------------------------------------------------------------------------------------------------------------------------------------------------------------------------------------------------------------------------------------------------------------------------------------------------------------------------------------------------------------------------------------------------------------------------------------------------------------------------------------------------------------------------------------------------------------------------------------------------------------------------------------------------------------------------------------------|
| 1. Alpha antagonist (prostate specific) | Alfuzosin, Apo-Alfuzosin, Auro-Alfuzosin, Flomax, Flomax CR, Rapaflo, Sandoz Alfuzosin, Tamsulosin, Tamsulosin CR, Teva-Alfuzosin PR, Teva-Tamsulosin CR, Xatral                                                                                                                                                                                                                                                                                                                                                                                                                                                                                                                                                                                                                                                                                                                                                                                                                                                                                                                                                                                                                                                                                                                                                                                                                                                                                                                                                                                                                                                                                                                                                                                                                                                                                                                                                                                                                                                                                                                                                                                                                                                                                                                                                     |
| 2. Alpha antagonist (non-specific)      | Doxazosin Mesylate, Prazosin HCL, Terazosin HCL                                                                                                                                                                                                                                                                                                                                                                                                                                                                                                                                                                                                                                                                                                                                                                                                                                                                                                                                                                                                                                                                                                                                                                                                                                                                                                                                                                                                                                                                                                                                                                                                                                                                                                                                                                                                                                                                                                                                                                                                                                                                                                                                                                                                                                                                      |
| 3. ACE inhibitors or ARBs               | Benazepril HCL, Candesartan Cilexetil, Candesartan Cilexetil & Hydrochlorothiazide, Captopril, Cilazapril, Cilazapril & Hydrochlorothiazide, Enalapril Maleate, Enalapril Sodium, Eprosartan Mesylate, Eprosartan Mesylate & Hydrochlorothiazide, Fosinopril Sodium, Irbesartan, Irbesartan & Hydrochlorothiazide, Lisinopril, Lisinopril & Hydrochlorothiazide, Losartan Potassium, Losartan Potassium & Hydrochlorothiazide, Olmesartan Medoxomil, Olmesartan Medoxomil & Hydrochlorothiazide, Perindopril Erbumine, Perindopril Erbumine & Indapamide, Quinapril HCL, Quinapril HCL & Hydrochlorothiazide, Ramipril, Ramipril & Hydrochlorothiazide, Telmisartan, Telmisartan & Hydrochlorothiazide, Trandolapril, Valsartan, Valsartan & Hydrochlorothiazide                                                                                                                                                                                                                                                                                                                                                                                                                                                                                                                                                                                                                                                                                                                                                                                                                                                                                                                                                                                                                                                                                                                                                                                                                                                                                                                                                                                                                                                                                                                                                     |
| 4. Androgen deprivation therapy         | Buserelin Acetate, Leuprolide Acetate, Goserelin Acetate                                                                                                                                                                                                                                                                                                                                                                                                                                                                                                                                                                                                                                                                                                                                                                                                                                                                                                                                                                                                                                                                                                                                                                                                                                                                                                                                                                                                                                                                                                                                                                                                                                                                                                                                                                                                                                                                                                                                                                                                                                                                                                                                                                                                                                                             |
| 5. Antibiotic                           | Amikacin, Amikacin Sulfate, Amoxicillin, Amoxicillin & Clavulanic Acid Potassium, Amoxicillin Trihydrate, Amoxicillin Trihydrate & Clavulanic Acid Potassium, Ampicillin, Ampicillin Sodium, Ampicillin Trihydrate, Azithromycin, Azithromycin Dihydrate, Bacampicillin HCL, Bacitracin, Bacitracin Zinc & Cysteine & Glycine & Neomycin Sulfate & Threonine, Bacitracin Zinc & Neomycin Sulfate & Polymyxin B Sulfate, Bacitracin Zinc & Polymyxin B Sulfate, Carbenicillin, Carbenicillin Disodium, Cefaclor, Cefadroxil, Cefadroxil Monohydrate, Cefazolin Sodium, Cefepime HCL, Cefixime, Cefoperazone Sodium, Cefotaxime Sodium, Cefoxitin Sodium, Cefprozil, Cephalixin Monohydrate, Cephalothin Sodium, Cephadrine, Ciprofloxacin, Ciprofloxacin HCL, Ciprofloxacin HCL & Dexamethasone, Clarithromycin, Clindamycin, Clindamycin Phosphate, Clindamycin Phosphate & Glycolic Acid, Cloxacillin, Cloxacillin Sodium, Colistin Sodium Methanesulfonate, Daptomycin, Dicloxacillin Sodium, Erythromycin, Erythromycin Estolate, Erythromycin Ethyl Succinate, Erythromycin Ethyl Succinate & Sulfisoxazole, Erythromycin Gluceptate, Erythromycin Lactobionate, Erythromycin Stearate, Flucloxacillin Sodium, Fluocinolone Acetonide & Neomycin Sulfate & Polymyxin B Sulfate, Framycetin Sulfate, Fusidic Acid, Fusidic Acid Sodium, Gatifloxacin, Gentamicin, Gentamicin & Colistin, Gentamicin Sulfate, Gramicidin & Neomycin Sulfate & Polymyxin B Sulfate, Gramicidin & Polymyxin B Sulfate, Grepafloxacin HCL, Levofloxacin, Linezolid, Moxifloxacin HCL, Mupirocin, Neomycin Sulfate, Neomycin Sulfate & Polymyxin B Sulfate, Netilmicin Sulfate, Norfloxacin, Ofloxacin, Paromomycin, Penicillin G Benzathine, Penicillin G Potassium, Penicillin G Procain Salt, Penicillin G Sodium, Penicillin V, Penicillin V Benzathine, Penicillin V Potassium, Piperacillin, Piperacillin Sodium & Tazobactam Sodium, Pivampicillin, Pivmecillinam, Polymyxin B & Trimethoprim, Spectinomycin HCL, Spiramycin, Streptomycin, Streptomycin Sulfate, Sulfabenzamide & Sulfacetamide & Sulfathiazole, Sulfacetamide Sodium, Sulfadiazine, Sulfadiazine & Trimethoprim, Sulfamethoxazole, Sulfamethoxazole & Trimethoprim, Sulfapyridine, Sulfisoxazole, Telithromycin, Tobramycin, Tobramycin Sulfate, Trimethoprim |
| 6. Anticoagulant                        | Dabigatran Etxilate, Dalteparin Sodium, Danaparoid Sodium, Enoxaparin, Enoxaparin Sodium, Fondaparinux Sodium, Heparin, Heparin Calcium, Heparin Sodium, Lepirudin, Nadroparin Calc, Rivaroxaban, Tinzaparin Sodium                                                                                                                                                                                                                                                                                                                                                                                                                                                                                                                                                                                                                                                                                                                                                                                                                                                                                                                                                                                                                                                                                                                                                                                                                                                                                                                                                                                                                                                                                                                                                                                                                                                                                                                                                                                                                                                                                                                                                                                                                                                                                                  |
| 7. Anticonvulsants                      | Ethosuximide, Fosphenytoin, Gabapentin, Lacosamide, Levetiracetam, Magnesium Pyrogluconate, Magnesium Sulfate, Mephentyoin, Mephobarbital, Methsuximide, Oxcarbazepine, Phenobarbital, Phensuximide, Phenytoin, Phenytoin Sodium, Pregabalin, Primidone, Secobarbital Sodium, Topiramate, Vigabatrin                                                                                                                                                                                                                                                                                                                                                                                                                                                                                                                                                                                                                                                                                                                                                                                                                                                                                                                                                                                                                                                                                                                                                                                                                                                                                                                                                                                                                                                                                                                                                                                                                                                                                                                                                                                                                                                                                                                                                                                                                 |
| 8. Antidepressants (SSRIs, SNRIs)       | Act Venlafaxine XR, Apo-Venlafaxine XR, Auro-Venlafaxine XR, Citalopram Hbr, Citalopram Hydrobromide, Dom-Venlafaxine XR, Effexor Tablets, 37.5mg, Effexor Tablets, 50mg, Effexor XR, Escitalopram Oxalate, Fluoxetine, Fluoxetine HCL, Fluvoxamine, Fluvoxamine Maleate, Gd-Venlafaxine XR, Mylan-Venlafaxine XR,                                                                                                                                                                                                                                                                                                                                                                                                                                                                                                                                                                                                                                                                                                                                                                                                                                                                                                                                                                                                                                                                                                                                                                                                                                                                                                                                                                                                                                                                                                                                                                                                                                                                                                                                                                                                                                                                                                                                                                                                   |

---

|                                        |                                                                                                                                                                                                                                                                                                                                                                                                                                                                                                                                                                                                                                                                                                                                                                                                                                                                                                                                                                                                                                                                                                                                                                                                                                    |
|----------------------------------------|------------------------------------------------------------------------------------------------------------------------------------------------------------------------------------------------------------------------------------------------------------------------------------------------------------------------------------------------------------------------------------------------------------------------------------------------------------------------------------------------------------------------------------------------------------------------------------------------------------------------------------------------------------------------------------------------------------------------------------------------------------------------------------------------------------------------------------------------------------------------------------------------------------------------------------------------------------------------------------------------------------------------------------------------------------------------------------------------------------------------------------------------------------------------------------------------------------------------------------|
|                                        | Nefazodone HCL, Ntp-Venlafaxine XR, Paroxetine, Paroxetine HCL, Plh-Venlafaxine XR, Pms-Venlafaxine XR, Pristiq, Ran-Venlafaxine XR, Riva-Venlafaxine XR, Sandoz Venlafaxine XR, Sertraline, Sertraline HCL, Teva-Venlafaxine XR, Venlafaxine Hydrochloride Extended-Release Capsules, Venlafaxine XR                                                                                                                                                                                                                                                                                                                                                                                                                                                                                                                                                                                                                                                                                                                                                                                                                                                                                                                              |
| <b>9. Antidepressants (Other)</b>      | Amitriptyline, Amitriptyline HCL, Amitriptyline HCL & Baclofen, Amitriptyline HCL & Perphenazine, Amoxapine, Bupropion HCL, Clomipramine HCL, Desipramine HCL, Doxepin HCL, Duloxetine, Imipramine, Imipramine HCL, Isocarboxazid, Maprotiline HCL, Mirtazapine, Moclobemide, Nortriptyline, Nortriptyline HCL, Phenelzine Sulfate, Protriptyline HCL, Selegiline HCL, Tranylcypromine Sulfate, Trazodone HCL, Trimipramine, Trimipramine Maleate                                                                                                                                                                                                                                                                                                                                                                                                                                                                                                                                                                                                                                                                                                                                                                                  |
| <b>10. Antiemetic</b>                  | Metoclopramide HCL, Domperidone Maleate, Domperidone                                                                                                                                                                                                                                                                                                                                                                                                                                                                                                                                                                                                                                                                                                                                                                                                                                                                                                                                                                                                                                                                                                                                                                               |
| <b>11. Antineoplastic</b>              | Abatacept, Aldesleukin, Alemtuzumab, Altretamine, Aminoglutethimide, Anastrozole, Asparaginase, Azathioprine, Bicalutamide, Bleomycin Sulfate, Buserelin Acetate, Busulfan, Capecitabine, Carmustine, Chlorambucil, Cladribine, Cyclophosphamide, Cyproterone Acetate, Cytarabine, Dacarbazine, Dasatinib Monohydrate, Daunorubicin, Degarelix Acetate, Diethylstilbestrol, Diethylstilbestrol Diphosphate Sodium, Doxorubicin HCL, Efalizumab, Epirubicin HCL, Erlotinib HCL, Estramustine Phosphate Disodium, Etoposide, Everolimus, Exemestane, Fludarabine Phosphate Sodium, Fluorouracil, Flutamide, Formestane, Goserelin Acetate, Hydroxyurea, Imatinib Mesylate, Interferon, Interferon Alfa-2b, Irinotecan HCL, Lanreotide, Lenalidomide, Letrozole, Leuprolide Acetate, Levamisole HCL, Lomustine, Mechlorethamine HCL, Megestrol Acetate, Melphalan, Mercaptopurine, Methotrexate Sodium, Mitomycin, Mitotane, Nilotinib HCL Monohydrate, Nilutamide, Porfimer Sodium, Procarbazine HCL, Rituximab, Sunitinib, Sorafenib, Sunitinib Malate, Tacrolimus, Tamoxifen Citrate, Temozolomide, Thioguanine, Thiotepa, Tretinoin, Triptorelin, Triptorelin Pamoate, Vaccine - B.C.G., Vinblastine Sulfate, Vincristine Sulfate |
| <b>12. Antiparkinson's Medications</b> | Benserazide HCL & Levodopa, Bromocriptine, Bromocriptine Mesylate, Carbidopa & Entacapone & Levodopa, Carbidopa & Levodopa, Entacapone, Levodopa, Levodopa & Carbidopa, Neurological Disorders, Misc, Pergolide Mesylate, Pramipexole Dihydrochloride Monohydrate, Pramipexole HCL, Rasagiline Mesylate, Ropinirole HCL, Selegiline HCL, Tolcapone                                                                                                                                                                                                                                                                                                                                                                                                                                                                                                                                                                                                                                                                                                                                                                                                                                                                                 |
| <b>13. Antiplatelet</b>                | Acetylsalicylic Acid & Dipyridamole, Clopidogrel, Clopidogrel Bisulfate, Dipyridamole, Prasugrel HCL, Ticlopidine, Ticlopidine HCL                                                                                                                                                                                                                                                                                                                                                                                                                                                                                                                                                                                                                                                                                                                                                                                                                                                                                                                                                                                                                                                                                                 |
| <b>14. Antipsychotic (atypical)</b>    | Aripiprazole, Quetiapine Fumarate, Risperidone, Olanzapine                                                                                                                                                                                                                                                                                                                                                                                                                                                                                                                                                                                                                                                                                                                                                                                                                                                                                                                                                                                                                                                                                                                                                                         |
| <b>15. Antipsychotic (other)</b>       | Chlorpromazine HCL, Clozapine, Codeine Phosphate & Phenylephrine HCL & Potassium Guaiacolsulfonate & Promethazine HCL, Codeine Phosphate & Potassium Guaiacolsulfonate & Promethazine HCL, Dextromethorphan HBR & Promethazine HCL & Pseudoephedrine HCL, Flupenthixol Decanoate, Flupenthixol HCL, Fluphenazine Decanoate, Fluphenazine Enanthate, Fluphenazine HCL, Guaiacolsulfonate Potassium & Phenylephrine HCL & Promethazine HCL, Haloperidol, Haloperidol Decanoate, Isopropamide Iodide & Prochlorperazine Maleate, Loxapine HCL, Loxapine Succinate, Meperidine HCL & Promethazine HCL, Mesoridazine Besylate, Methotrimeprazine, Olanzapine Tartrate, Paliperidone, Pericyazine, Perphenazine, Pimozide, Pipotiazine Palmitate, Potassium Guaiacolsulfonate & Promethazine HCL, Prochlorperazine, Prochlorperazine Dimaleate, Prochlorperazine Maleate, Prochlorperazine Mesylate, Promethazine, Promethazine HCL, Risperidone, Sulpiride, Thioridazine HCL, Thiothixene, Trifluoperazine HCL, Ziprasidone HCL, Zuclopenthixol Acetate, Zuclopenthixol Decanoate, Zuclopenthixol Dihydrochloride                                                                                                                       |
| <b>16. Benzodiazepine</b>              | Alprazolam, Bromazepam, Chlordiazepoxide HCL, Chlordiazepoxide HCL & Clidinium Bromide, Clobazam, Clonazepam, Clorazepate Dipotassium, Diazepam, Diazepam & Methylcellulose, Estazolam, Flumazenil, Flurazepam HCL, Flurazepam Hydrochloride, Ketazolam, Lorazepam, Midazolam HCL, Nitrazepam, Oxazepam, Temazepam, Triazolam, Zaleplon, Zopiclone                                                                                                                                                                                                                                                                                                                                                                                                                                                                                                                                                                                                                                                                                                                                                                                                                                                                                 |
| <b>17. Beta blockers</b>               | Acebutolol HCL, Atenolol, Atenolol & Chlorthalidone, Betaxolol HCL, Bisoprolol Fumarate, Brimonidine Tartrate & Timolol Maleate, Brinzolamide & Timolol Maleate, Carvedilol, Labetalol HCL, Metoprolol Tartrate, Nadolol, Oxprenolol HCL, Pindolol, Pindolol & Hydrochlorothiazide, Propranolol HCL, Propranolol HCL & Hydrochlorothiazide, Sotalol HCL, Timolol Maleate, Timolol Maleate & Travoprost                                                                                                                                                                                                                                                                                                                                                                                                                                                                                                                                                                                                                                                                                                                                                                                                                             |
| <b>18. Bisphosphonate</b>              | Alendronate, Alendronate Sodium, Alendronate Sodium & Cholecalciferol, Calcium Carbonate & Etidronic Acid, Calcium Carbonate & Etidronic Acid Sodium, Calcium Carbonate & Risedronate Sodium, Clodronate Disodium, Clodronic Acid Disodium,                                                                                                                                                                                                                                                                                                                                                                                                                                                                                                                                                                                                                                                                                                                                                                                                                                                                                                                                                                                        |

---

---

|                                                                 |                                                                                                                                                                                                                                                                                                                                                                                                                                                                                                                                                                                                                                                                                                                                                                                                                                                                                                                                                                                                                                                                                                                                                                                                                                                                                                                                                                                                                                                                                                                                                                                                                                                                                                                                                                                                                                                                                                                                                                                                                                                                                                                                                                                                                                                                                                                                                                                                                                                                             |
|-----------------------------------------------------------------|-----------------------------------------------------------------------------------------------------------------------------------------------------------------------------------------------------------------------------------------------------------------------------------------------------------------------------------------------------------------------------------------------------------------------------------------------------------------------------------------------------------------------------------------------------------------------------------------------------------------------------------------------------------------------------------------------------------------------------------------------------------------------------------------------------------------------------------------------------------------------------------------------------------------------------------------------------------------------------------------------------------------------------------------------------------------------------------------------------------------------------------------------------------------------------------------------------------------------------------------------------------------------------------------------------------------------------------------------------------------------------------------------------------------------------------------------------------------------------------------------------------------------------------------------------------------------------------------------------------------------------------------------------------------------------------------------------------------------------------------------------------------------------------------------------------------------------------------------------------------------------------------------------------------------------------------------------------------------------------------------------------------------------------------------------------------------------------------------------------------------------------------------------------------------------------------------------------------------------------------------------------------------------------------------------------------------------------------------------------------------------------------------------------------------------------------------------------------------------|
|                                                                 | Etidronate & Calcium Carbonate, Etidronate Disodium, Etidronic Acid Disodium, Ibandronate, Pamidronate Disodium, Pamidronic Acid Disodium, Risedronate Sodium, Risedronate Sodium & Calcium, Risedronate Sodium & Calcium & Vitamin D3, Zoledronic Acid                                                                                                                                                                                                                                                                                                                                                                                                                                                                                                                                                                                                                                                                                                                                                                                                                                                                                                                                                                                                                                                                                                                                                                                                                                                                                                                                                                                                                                                                                                                                                                                                                                                                                                                                                                                                                                                                                                                                                                                                                                                                                                                                                                                                                     |
| <b>19. Calcium channel blockers</b>                             | Amlodipine Besylate, Amlodipine Besylate & Atorvastatin, Diltiazem HCL, Erythryl Tetranitrate, Felodipine, Flunarizine HCL, Nicardipine HCL, Nifedipine, Nimodipine, Verapamil HCL                                                                                                                                                                                                                                                                                                                                                                                                                                                                                                                                                                                                                                                                                                                                                                                                                                                                                                                                                                                                                                                                                                                                                                                                                                                                                                                                                                                                                                                                                                                                                                                                                                                                                                                                                                                                                                                                                                                                                                                                                                                                                                                                                                                                                                                                                          |
| <b>20. Cholinesterase inhibitors</b>                            | APO-Rivastigmine, Aricept, Exelon, Mylan-Galantamine ER, Mylan-Rivastigmine, Pat-Galantamine ER, PMS-Rivastigmine, Ratio-Rivastigmine, Reminyl, Reminyl ER, Sandoz-Rivastigmine, Teva-Rivastigmine                                                                                                                                                                                                                                                                                                                                                                                                                                                                                                                                                                                                                                                                                                                                                                                                                                                                                                                                                                                                                                                                                                                                                                                                                                                                                                                                                                                                                                                                                                                                                                                                                                                                                                                                                                                                                                                                                                                                                                                                                                                                                                                                                                                                                                                                          |
| <b>21. Coumadin</b>                                             | Warfarin                                                                                                                                                                                                                                                                                                                                                                                                                                                                                                                                                                                                                                                                                                                                                                                                                                                                                                                                                                                                                                                                                                                                                                                                                                                                                                                                                                                                                                                                                                                                                                                                                                                                                                                                                                                                                                                                                                                                                                                                                                                                                                                                                                                                                                                                                                                                                                                                                                                                    |
| <b>22. Digoxin</b>                                              | Digoxin                                                                                                                                                                                                                                                                                                                                                                                                                                                                                                                                                                                                                                                                                                                                                                                                                                                                                                                                                                                                                                                                                                                                                                                                                                                                                                                                                                                                                                                                                                                                                                                                                                                                                                                                                                                                                                                                                                                                                                                                                                                                                                                                                                                                                                                                                                                                                                                                                                                                     |
| <b>23. Glucocorticoids</b>                                      | Betameth, Budesoni, Cortison, Dexameth, Fludroco, Hydrocor, Methylpr, Predniso, Triamcin                                                                                                                                                                                                                                                                                                                                                                                                                                                                                                                                                                                                                                                                                                                                                                                                                                                                                                                                                                                                                                                                                                                                                                                                                                                                                                                                                                                                                                                                                                                                                                                                                                                                                                                                                                                                                                                                                                                                                                                                                                                                                                                                                                                                                                                                                                                                                                                    |
| <b>24. Inhaled acetylcholine</b>                                | Ipratropium Bromide, Tiotropium Bromide                                                                                                                                                                                                                                                                                                                                                                                                                                                                                                                                                                                                                                                                                                                                                                                                                                                                                                                                                                                                                                                                                                                                                                                                                                                                                                                                                                                                                                                                                                                                                                                                                                                                                                                                                                                                                                                                                                                                                                                                                                                                                                                                                                                                                                                                                                                                                                                                                                     |
| <b>25. Inhaled beta-agonist</b>                                 | Albuterol, Albuterol & Albuterol Sulfate, Albuterol Sulfate, Albuterol Sulfate & Ipratropium Bromide, Budesonide & Formoterol Fumarate, Fenoterol HBR, Fluticasone Propionate & Salmeterol Xinafoate, Foradil, Metaproterenol Sulfate, Oxeze, Pirbuterol Acetate, Procaterol HCL, Salmeterol Xinafoate, Terbutaline Sulfate, Zenhale                                                                                                                                                                                                                                                                                                                                                                                                                                                                                                                                                                                                                                                                                                                                                                                                                                                                                                                                                                                                                                                                                                                                                                                                                                                                                                                                                                                                                                                                                                                                                                                                                                                                                                                                                                                                                                                                                                                                                                                                                                                                                                                                        |
| <b>26. Inhaled corticosteroid</b>                               | Beclomethasone Dipropionate, Budesonide, Ciclesonide, Flunisolide, Fluticasone Propionate, Triamcinolone Acetonide                                                                                                                                                                                                                                                                                                                                                                                                                                                                                                                                                                                                                                                                                                                                                                                                                                                                                                                                                                                                                                                                                                                                                                                                                                                                                                                                                                                                                                                                                                                                                                                                                                                                                                                                                                                                                                                                                                                                                                                                                                                                                                                                                                                                                                                                                                                                                          |
| <b>27. Mood stabilizer</b>                                      | Lamotrigine, Lithium Carbonate, Lithium Citrate, Carbamazepine                                                                                                                                                                                                                                                                                                                                                                                                                                                                                                                                                                                                                                                                                                                                                                                                                                                                                                                                                                                                                                                                                                                                                                                                                                                                                                                                                                                                                                                                                                                                                                                                                                                                                                                                                                                                                                                                                                                                                                                                                                                                                                                                                                                                                                                                                                                                                                                                              |
| <b>28. Narcotics</b>                                            | Acetaminophen & Caffeine & Codeine, Acetaminophen & Caffeine & Codeine Phosphate, Acetaminophen & Caffeine Citrate & Codeine Phosphate, Acetaminophen & Chlorzoxazone & Codeine, Acetaminophen & Chlorzoxazone & Codeine Phosphate, Acetaminophen & Codeine & Doxylamine, Acetaminophen & Codeine Phosphate, Acetaminophen & Dextromethorphan HBR & Doxylamine & Pseudoephedrine HCL, Acetaminophen & Dextromethorphan HBR & Doxylamine Succinate & Pseudoephedrine HCL, Acetaminophen & Oxycodone HCL, Acetaminophen & Pseudoephedrine HCL, Acetylsalicylic Acid & Caffeine & Codeine Phosphate, Acetylsalicylic Acid & Caffeine & Dextropropoxyphene HCL, Acetylsalicylic Acid & Caffeine & Pentazocine HCL, Acetylsalicylic Acid & Caffeine & Propoxyphene HCL, Acetylsalicylic Acid & Codeine Phosphate, Acetylsalicylic Acid & Oxycodone HCL, Alfentanil HCL, Ammonium Chloride & Codeine Phosphate & Guaifenesin, Analgesics, Anileridine HCL, Atropine Sulfate & Attapulgit & Hyoscyamine Sulfate & Opium Powder & Pectin & Scopolamine Hbr, Belladonna & Opium, Belladonna Extract For Oral Use & Opium Powder, Bupivacaine & Fentanyl, Butorphanol Tartrate, Codeine, Codeine Phosphate, Codeine Sulfate, Dextromethorphan Hbr & Guaifenesin & Menthol, Dextropropoxyphene HCL, Dextropropoxyphene Napsylate, Diamorphine HCL, Fentanyl, Fentanyl & Baclofen, Fentanyl & Baclofen & Clonidine, Fentanyl & Bupivacaine, Fentanyl & Bupivacaine & Baclofen, Fentanyl & Bupivacaine & Clonidine, Fentanyl & Bupivacaine & Clonidine & Baclofen, Fentanyl & Clonidine HCL, Fentanyl Citrate, Hydrocodone Bitartrate & Ibuprofen, Hydromorphone & Bupivacaine & Clonidine, Hydromorphone, Hydromorphone & Baclofen, Hydromorphone & Bupivacaine, Hydromorphone & Bupivacaine & Baclofen, Hydromorphone & Bupivacaine & Baclofen & Clonidine, Hydromorphone & Bupivacaine & Clonidine, Hydromorphone Hbr, Hydromorphone HCL, Ibuprofen & Diphenhydramine HCL, Levorphanol Tartrate, Meperidine HCL, Morphine, Morphine & Baclofen, Morphine & Bupivacaine, Morphine & Bupivacaine & Baclofen, Morphine & Lioresal, Morphine HCL, Morphine Succinate, Morphine Sulfate, Nalbuphine HCL, Naloxone HCL & Oxycodone HCL, Narcotic Compound, Opium, Opium & Belladonna, Opium & Camphor, Opium Tincture, Oxycodone HCL, Oxymorphone HCL, Pentazocine HCL, Pentazocine Lactate, Propoxyphene HCL, Remifentanil HCL, Sufentanil Citrate, Tapentadol HCL, Tramadol, Tramadol HCL |
| <b>29. Non-potassium sparing diuretics</b>                      | Bumetanide, Chlorthalidone, Ethacrynic Acid, Furosemide, Hydrochlorothiazide, Indapamide, Methyldopa & Hydrochlorothiazide, Metolazone, Timolol Maleate & Hydrochlorothiazide                                                                                                                                                                                                                                                                                                                                                                                                                                                                                                                                                                                                                                                                                                                                                                                                                                                                                                                                                                                                                                                                                                                                                                                                                                                                                                                                                                                                                                                                                                                                                                                                                                                                                                                                                                                                                                                                                                                                                                                                                                                                                                                                                                                                                                                                                               |
| <b>30. Nonsteroidal anti-inflammatories (excluding aspirin)</b> | Cannabidiol & Dronabinol, Celecoxib, Diclofenac Sodium, Diclofenac Sodium & Misoprostol, Diflunisal, Etodolac, Fenoprofen Calcium, Floctafenine, Flurbiprofen, Glucosamine & Chondroitin, Ibuprofen, Indomethacin, Ketoprofen, Ketorolac Tromethamine, Mefenamic Acid, Meloxicam, Nabumetone, Naproxen, Naproxen                                                                                                                                                                                                                                                                                                                                                                                                                                                                                                                                                                                                                                                                                                                                                                                                                                                                                                                                                                                                                                                                                                                                                                                                                                                                                                                                                                                                                                                                                                                                                                                                                                                                                                                                                                                                                                                                                                                                                                                                                                                                                                                                                            |

---

---

|                                          |                                                                                                                                                                                                                                                     |
|------------------------------------------|-----------------------------------------------------------------------------------------------------------------------------------------------------------------------------------------------------------------------------------------------------|
|                                          | Sodium, Oxaprozin, Phenylbutazone, Piroxicam, Rofecoxib, Sulindac, Tenoxicam, Tiaprofenic Acid, Tolmetin Sodium, Valdecoxib                                                                                                                         |
| <b>31. Overactive bladder medication</b> | Darifenacin, Flavoxate HCL, Oxybutynin, Oxybutynin Chloride, Solifenacin Succinate, Tolterodine Tartrate, Trospium Chloride, Trospium Hydroxide Chloride                                                                                            |
| <b>32. Potassium sparing diuretics</b>   | Amiloride HCL, Amiloride HCL & Hydrochlorothiazide, Eplerenone, Spironolactone, Spironolactone & Hydrochlorothiazide, Triamterene, Triamterene & Hydrochlorothiazide                                                                                |
| <b>33. Proton Pump inhibitors</b>        | Amoxicillin Trihydrate & Clarithromycin & Lansoprazole, Dexlansoprazole, Esomeprazole Magnesium, Lansoprazole, Lansoprazole Sodium, Omeprazole, Omeprazole Magnesium, Pantoprazole, Pantoprazole Magnesium, Pantoprazole Sodium, Rabeprazole Sodium |
| <b>34. Smoking cessation aid</b>         | Varenicline Tartrate, Bupropion HCL, Nicotine                                                                                                                                                                                                       |
| <b>35. Statins</b>                       | Atorvastatin, Cerivastatin Sodium, Fluvastatin Sodium, Lovastatin, Pravastatin Sodium, Rosuvastatin Calcium, Simvastatin                                                                                                                            |
| <b>36. Testosterone replacement</b>      | Androderm, Androgel, Methyltestosterone, Testim, Testosterone, Testosterone Cypionate, Testosterone Cypionate, Testosterone Decanoate, Testosterone Enanthate, Testosterone Powder, Testosterone Propionate                                         |

---

Data source was the ODB, which provides universal medication coverage to all people over 65 years of age. Each medication is identified with a unique and permanent DIN. The presence of any medication within the medication class in the 6 months prior to the index date was considered evidence of recent or current medication usage.

**eTable 2c.** Administrative data definitions used to define medical investigations and procedures. A 1 year lookback window relative to the index date was used.

| Variable                                 | Database         | Codes                                                                                                                                                                                                                                                             |
|------------------------------------------|------------------|-------------------------------------------------------------------------------------------------------------------------------------------------------------------------------------------------------------------------------------------------------------------|
| 1. Bone mineral density test             | OHIP             | OHIP Fee Code: J654, J688, J854, J888, X149, X152, X153, X155, Y654, Y688, Y854, Y888                                                                                                                                                                             |
| 2. Bone scan                             | OHIP             | OHIP Fee Code: J850, J650, J852, J862                                                                                                                                                                                                                             |
| 3. Cardiac catheterization               | CIHI-DAD<br>OHIP | CCP: 4995, 4996, 4997<br>CCI: 3IJ30GP, 3HZ30GP, 2HZ24GPKJ, 2HZ24GPKL, 2HZ24GPKM, 2HZ24GPXJ, 2HZ28GPPL, 2HZ71GP<br>OHIP Fee Code: G296, G297, G299, G300, G301, G304, G305, G306                                                                                   |
| 4. Cardiac stress test                   | CIHI-DAD<br>OHIP | CCP: 0341, 0342, 0343, 0344, 0605<br>CCI: 2HZ08, 3IP70<br>OHIP Fee Code: G315, G174, G111, G112, G319, G582, G583, G584, J604, J606, J607, J608, J611, J612, J613, J667, J807, J808, J809, J804, J811, J812, J813, J866, J867, J609, J666, J814, J614, J810, J610 |
| 5. Carotid endarterectomy                | OHIP             | OHIP Fee Code: N220, R792                                                                                                                                                                                                                                         |
| 6. Carotid ultrasound                    | CIHI-DAD<br>OHIP | CCP: 0281<br>CCI: 3JE30, 3JG30<br>OHIP Fee Code: J201, J501, J190, J191, J490, J491, J492                                                                                                                                                                         |
| 7. Chest x-ray                           | OHIP             | OHIP Fee Code: X090, X091, X092, X195                                                                                                                                                                                                                             |
| 8. CT head                               | OHIP             | OHIP Fee Code: X188, X400, X401, X402, X405, X408                                                                                                                                                                                                                 |
| 9. CT spine                              | OHIP             | OHIP Fee Code: X128, X415, X416                                                                                                                                                                                                                                   |
| 10. Echocardiography                     | CIHI-DAD<br>OHIP | CCP: 0282<br>CCI: 3IP30<br>OHIP Fee Code: G560, G561, G562, G566, G567, G568, G570, G571, G572, G574, G575, G576, G577, G578, G581                                                                                                                                |
| 11. ECT                                  | OHIP             | OHIP Fee Code: G478, G479                                                                                                                                                                                                                                         |
| 12. EEG                                  | OHIP             | OHIP Fee Code: G414, G415, G416, G417, G418, G540, G542, G544, G545, G546, G554, G555                                                                                                                                                                             |
| 13. Heart valve replacement              | OHIP             | OHIP Fee Code: R728, R735, R738, R772                                                                                                                                                                                                                             |
| 14. Holter monitoring                    | CIHI-DAD<br>OHIP | CCP: 0354<br>CCI: 2HZ24JAKH<br>OHIP Fee Code: G311, G320, G647, G648, G649, G650, G651, G652, G653, G654, G655, G656, G657, G658, G659, G660, G661, G682, G683, G684, G685, G686, G687, G688, G689, G690, G692, G693                                              |
| 15. MRI head                             | OHIP             | OHIP Fee Code: X421, X425                                                                                                                                                                                                                                         |
| 16. MRI spine                            | OHIP             | OHIP Fee Code: X490, X492, X493, X495, X496, X498                                                                                                                                                                                                                 |
| 17. Prostate-specific antigen (PSA) test | OHIP             | OHIP Fee Code: L358                                                                                                                                                                                                                                               |
| 18. Pulmonary function test              | OHIP             | OHIP Fee Code: J301, J303, J304, J305, J306, J307, J308, J309, J310, J311, J313, J315, J316, J317, J318, J319, J320, J322, J323, J324, J327, J328, J330, J331, J332, J333, J334, J335, J340, J341, E450, E451                                                     |
| 19. TRUS biopsy                          | OHIP             | OHIP Fee Code: E780, Z712                                                                                                                                                                                                                                         |
| 20. TURP                                 | OHIP             | OHIP Fee Code: S655, S654                                                                                                                                                                                                                                         |
| 21. Urine culture                        | OHIP             | OHIP Fee Code: L633, L634, L641                                                                                                                                                                                                                                   |

Data sources included CIHI-DAD (inpatient discharge abstracts) and OHIP (physician billings). CIHI-DAD used ICD-10 (for diagnostic coding) and CCI coding (for interventions) after April 1, 2002, and ICD-9/CCP coding prior to this. Specific OHIP, ICD 9/10 and CCP/CCI codes are defined above. The presence of any data element within the year prior to the index date was considered evidence of the medical test or intervention.

**eTable 3.** Variables included in the propensity score. Variables were included based on 1) an initial standardized difference >7%, 2) a potentially important relationship with study outcomes, or 3) a standardized difference >10% after initial matching.<sup>1</sup>

| <b>Demographics</b>                             | <b>Reason for inclusion</b>      |
|-------------------------------------------------|----------------------------------|
| Age                                             | SD > 0.07                        |
| Socioeconomic status                            | Potential confounder             |
| Residing in a long-term care facility           | SD > 0.07                        |
| <b>Comorbid medical conditions</b>              |                                  |
| BPH                                             | SD > 0.07                        |
| Prostate Cancer                                 | SD > 0.07 after initial matching |
| Alcoholism                                      | Potential confounder             |
| Acute urinary retention                         | SD > 0.07                        |
| Diabetes                                        | SD > 0.07                        |
| Hypertension                                    | SD > 0.07                        |
| UTI                                             | SD > 0.07                        |
| Substance abuse                                 | Potential confounder             |
| Schizophrenia/delusional disorder               | Potential confounder             |
| Bipolar                                         | Potential confounder             |
| Personality disorder                            | Potential confounder             |
| <b>Comorbidity Index</b>                        |                                  |
| Charlson comorbidity score                      | SD > 0.07 after initial matching |
| John Hopkins Aggregated Diagnostic Groups (ADG) | SD > 0.07                        |
| <b>Medication use</b>                           |                                  |
| Prostate specific alpha blocker                 | SD > 0.07                        |
| Antipsychotics                                  | Potential confounder             |
| Atypical Antipsychotics                         | Potential confounder             |
| Mood stabiliser                                 | Potential confounder             |
| ACEI/ARB                                        | SD > 0.07                        |
| Benzodiazepine                                  | Potential confounder             |
| Antineoplastic                                  | SD > 0.07                        |
| Antibiotic                                      | SD > 0.07                        |
| Androgen deprivation therapy                    | SD > 0.07                        |
| Overactive bladder medications                  | SD > 0.07                        |
| Narcotics                                       | Potential confounder             |
| Total number of unique medications              | SD > 0.07                        |
| <b>Hospital and physician utilization</b>       |                                  |
| Number of hospital admissions                   | SD > 0.07                        |
| Number of psychiatric hospital admissions       | Potential confounder             |
| Number of emergency room visits                 | SD > 0.07                        |
| Number of family physician visits               | SD > 0.07                        |
| Number of family physician mental health visits | Potential confounder             |
| Number of psychiatry visits                     | Potential confounder             |
| Number of urologist visits                      | SD > 0.07                        |
| <b>Medical investigations and procedures</b>    |                                  |
| Electroconvulsive therapy                       | Potential confounder             |
| CT head                                         | Potential confounder             |
| MRI head                                        | Potential confounder             |
| Pulmonary function test                         | SD > 0.07                        |
| Urine culture                                   | SD > 0.07                        |
| Prior TURP                                      | SD > 0.07 after initial matching |
| Prostate specific antigen test                  | SD > 0.07                        |
| Transrectal ultrasound guided prostate biopsy   | SD > 0.07                        |

SARIs in our study population are only indicated for the treatment of lower urinary tract symptoms from BPH. They may have also been used to treat gross hematuria in BPH patients, and although they may reduce the risk of prostate cancer<sup>2</sup>, they were not approved, or widely used for this indication. The potential confounders of socioeconomic status, alcoholism, psychiatric diseases and medications, narcotics, electroconvulsive therapy and CT/MRI head were included due to a potential relationship with suicide or depression, although prior to the propensity score adjustment these were well balanced and therefore unlikely to confound our results. Exposed



men had a higher level of hospital/emergency room admissions, and family physician visits, which may have led to an increased risk of our secondary outcomes due to the increased health care contact leading to a greater propensity to diagnose depression or detect self-harm if they were not included in the propensity score. Similarly, exposed men tended to have more medical comorbidities, as measured by the John Hopkins ADG score, which is a risk factor for suicide.

### References (eTable 3)

<sup>1</sup>Austin PC. Using the standardized difference to compare the prevalence of a binary variable between two groups in observational research. *Communications in Statistics - Simulation and Computation* 2009;38:1228–34.

<sup>2</sup>Thompson, I. M., Goodman, P. J., Tangen, C. M., Lucia, M. S., Miller, G. J., Ford, L. G., et al. (2003). The influence of finasteride on the development of prostate cancer. *The New England Journal of Medicine*, 349(3), 215–224.

**eTable 4.** Coding definition for primary and secondary outcomes.

|                  | Data sources | Codes                                                                                                |
|------------------|--------------|------------------------------------------------------------------------------------------------------|
| Suicide          | ORGD         | ICD 10 X60-X84                                                                                       |
|                  | NACRS        | ICD 10 X60-X84 AND visdisp2002 = 10 or 11 (dead on arrival or death after arrival)                   |
|                  | OMHRS        | Discharge reason = 2 (died from suicide)                                                             |
| Probable suicide | CIHI-DAD     | ICD 10 X60-X84 AND dischdisp=07 (death after arrival) or suicide=1                                   |
|                  | ORGD         | ICD 10 Y10-32, Y34                                                                                   |
|                  | NACRS        | ICD 10 Y10-32, Y34 AND visdisp2002 = 10 or 11 (dead on arrival or death after arrival)               |
| Self-harm*       | CIHI-DAD     | ICD 10 Y10-32, Y34 AND dischdisp=07 (death after arrival)                                            |
|                  | NACRS        | ICD 10 X60-X84                                                                                       |
|                  | OMHRS        | Self-injury attempts ≥1, Self-injury intent=true, Self-injury considered=true, Self-injury plan=true |
| Depression       | CIHI-DAD     | ICD 10 F32.0, F32.1, F32.2, F32.3, F32.8, F32.9, F33.0, F33.1, F33.2, F33.3, F33.4, F33.8, F34.1     |
|                  | OHIP         | ≥2 family physician visits within 2 years, each with ICD 9 311<br>≥1 psychiatry visit with ICD 9 311 |
|                  | OMHRS        | Axis I code for major depressive disorder (29620-29626, 29630-29636, 31100)                          |

\*Self-harm includes suicide attempts and para-suicide behavior that presents to the emergency room (ICD 10 X60-84), and men with a recent history of suicide attempt/para-suicide behavior that results in admission to a psychiatric hospital (Self-injury attempts ≥1). It also includes men who are admitted to a psychiatric hospital because of only thoughts of self-harm (Self-injury intent=true, Self-injury considered=true, Self-injury plan=true).

ORGD (Ontario register general death) contains cause of death for all residents based on death certificates. NACRS (National Ambulatory Care Reporting System, all emergency room visits), OMHRS (Ontario Mental Health Reporting System, all psychiatric hospitalisations after 2005), and CIHI-DAD (Canadian Institute for health informatics inpatient discharge abstracts) are based on data extracted from medical records by trained abstractors, and data quality is maintained through audit-feedback systems. Data on diagnoses are coded using ICD 10. For NACRS, OMHRS, and CIHI-DAD, up to 25 diagnoses can be coded per patient per admission/visit. Data elements have >80% agreement with medical records during reabstraction studies. [1-3]

A prior validation study[4] demonstrated that Ontario coroners had high inter-rater consistency when identifying deaths from hanging and carbon monoxide poisoning as suicide, however were more likely to code over the counter medication overdose, heroin intoxication, or drowning suicides as an undetermined cause of death. Older males in Canada who die from suicide tend to use methods with little equivocation as to intent (firearm, hanging, suffocation).[5] Coroner reports have been used in numerous studies to evaluate suicide rates and risk factors.[6]

Validation studies in the United Kingdom assessing the electronic coding accuracy of suicide as a cause of death, and self-harm behavior have suggested that the positive predictive value of suicide coding is 88% (78-94%) and the positive predictive value of self-harm coding is 89% (82 to 95%).[7] The ICD 10 codes used for suicide and self-harm have been used in several prior Ontario-based studies. [8-10]

A systematic review has summarised the results of validation studies for administrative data definitions of depression.[11] Positive predictive values for ICD 10 coding algorithms range from 89.5 to 91.1%, and jurisdiction specific algorithms were recommended. A Canadian study[12] validated the use of physician billing records and hospital discharge abstracts for identifying depression, and this definition was used for our study (with the addition of OMHRS data, which would be expected to improve the specificity of this algorithm further). The algorithm's sensitivity was 77.5%, specificity 93.0%, positive predictive value 91.6%, negative predictive value 80.7%, Kappa 0.71 (95% CI 0.64 to 0.77).

## References (eTable 4)

- 1 Roos LL, Gupta S, Soodeen R-A, *et al.* Data quality in an information-rich environment: Canada as an example. *Can J Aging* 2005;**24 Suppl 1**:153–70.
- 2 Ontario Mental Health Reporting System, Data Quality Documentation, 2011–2012. 2013;:1–20. [https://www.cihi.ca/en/omhrs\\_dq\\_2011-2012\\_en.pdf](https://www.cihi.ca/en/omhrs_dq_2011-2012_en.pdf) (accessed 15 Aug 2016).
- 3 Urbanoski KA, Mulsant BH, Willett P, *et al.* Real-world evaluation of the Resident Assessment Instrument-Mental Health assessment system. *Can J Psychiatry* 2012;**57**:687–95.
- 4 Parai JL, Kreiger N, Tomlinson G, *et al.* The Validity of the Certification of Manner of Death by Ontario Coroners. *Ann Epidemiol* 2006;**16**:805–11. doi:10.1016/j.annepidem.2006.01.006
- 5 Heisel MJ. Suicide and its prevention among older adults. *Can J Psychiatry* 2006;**51**:143–54.
- 6 Cheung G, Merry S, Sundram F. Medical examiner and coroner reports: uses and limitations in the epidemiology and prevention of late-life suicide. *Int J Geriatr Psychiatry* 2015;**30**:781–92. doi:10.1002/gps.4294
- 7 Arana A, Wentworth CW, Arellano FM. Validity of the codes of suicidality in the THIN database. *Pharmacoepidemiol Drug Saf* 2010;**19**:1316–9. doi:10.1002/pds.1998
- 8 Finkelstein Y, Macdonald EM, Hollands S, *et al.* Risk of Suicide Following Deliberate Self-poisoning. *JAMA Psychiatry* Published Online First: 1 April 2015. doi:10.1001/jamapsychiatry.2014.3188
- 9 Bhatti JA, Nathens AB, Thiruchelvam D, *et al.* Self-harm Emergencies After Bariatric Surgery: A Population-Based Cohort Study. *JAMA Surgery* 2015;**151**:1–7. doi:10.1001/jamasurg.2015.3414
- 10 Fralick M, Thiruchelvam D, Tien HC, *et al.* Risk of suicide after a concussion. *Canadian Medical Association Journal* Published Online First: 8 February 2016. doi:10.1503/cmaj.150790
- 11 Fiest KM, Jette N, Quan H, *et al.* Systematic review and assessment of validated case definitions for depression in administrative data. *BMC Psychiatry* 2014;**14**:289–9. doi:10.1186/s12888-014-0289-5
- 12 Alaghebandan R, MacDonald D, Barrett B, *et al.* Using administrative databases in the surveillance of depressive disorders--case definitions. *Popul Health Manag* 2012;**15**:372–80. doi:10.1089/pop.2011.0084

**eTable 5.** Complete baselines for unmatched and matched cohorts.

| Demographics                             |              | Pre-match    |       |              |       |      | Post-match   |       |              |       |      |
|------------------------------------------|--------------|--------------|-------|--------------|-------|------|--------------|-------|--------------|-------|------|
|                                          |              | Unexposed    |       | Exposed      |       | SD*  | Unexposed    |       | Exposed      |       | SD   |
|                                          |              | N            | %     | N            | %     |      | N            | %     | N            | %     |      |
| Age                                      | Mean (SD)    | 74.85 (6.74) |       | 75.52 (6.66) |       | 0.1  | 75.84 (6.86) |       | 75.56 (6.69) |       | 0.05 |
|                                          | Median (IQR) | 74 (69-79)   |       | 75 (70-80)   |       |      | 75 (70-81)   |       | 75 (70-80)   |       |      |
|                                          | 66-69.9      | 141589       | 26.8% | 23803        | 22.4% | 0.1  | 20133        | 21.6% | 20832        | 22.4% | 0.02 |
|                                          | 70-74.9      | 143425       | 27.1% | 28063        | 26.4% | 0.02 | 24031        | 25.8% | 24394        | 26.2% | 0.01 |
|                                          | 75-79.9      | 113329       | 21.4% | 25338        | 23.8% | 0.06 | 21612        | 23.2% | 22126        | 23.7% | 0.01 |
|                                          | 80-84.9      | 77144        | 14.6% | 17679        | 16.6% | 0.06 | 15851        | 17.0% | 15567        | 16.7% | 0.01 |
|                                          | 85-89.9      | 38173        | 7.2%  | 8580         | 8.1%  | 0.03 | 8283         | 8.9%  | 7602         | 8.2%  | 0.03 |
|                                          | ≥90          | 14751        | 2.8%  | 2966         | 2.8%  | 0    | 3287         | 3.5%  | 2676         | 2.9%  | 0.03 |
| Fiscal Year of Cohort Entry (index date) | 2003         | 503          | 0.1%  | 127          | 0.1%  | 0.00 | 85           | 0.1%  | 91           | 0.1%  | 0.00 |
|                                          | 2004         | 25682        | 4.9%  | 5991         | 5.6%  | 0.03 | 4349         | 4.7%  | 4455         | 4.8%  | 0.00 |
|                                          | 2005         | 36221        | 6.9%  | 8319         | 7.8%  | 0.03 | 6436         | 6.9%  | 6429         | 6.9%  | 0.00 |
|                                          | 2006         | 39863        | 7.5%  | 8971         | 8.4%  | 0.03 | 7184         | 7.7%  | 7164         | 7.7%  | 0.00 |
|                                          | 2007         | 49914        | 9.4%  | 10858        | 10.2% | 0.03 | 9009         | 9.7%  | 9003         | 9.7%  | 0.00 |
|                                          | 2008         | 54721        | 10.4% | 11590        | 10.9% | 0.02 | 9879         | 10.6% | 9907         | 10.6% | 0.00 |
|                                          | 2009         | 63501        | 12.0% | 12927        | 12.1% | 0.00 | 11397        | 12.2% | 11477        | 12.3% | 0.00 |
|                                          | 2010         | 68260        | 12.9% | 13432        | 12.6% | 0.01 | 12618        | 13.5% | 12492        | 13.4% | 0.00 |
|                                          | 2011         | 69859        | 13.2% | 13201        | 12.4% | 0.02 | 12458        | 13.4% | 12478        | 13.4% | 0.00 |
|                                          | 2012         | 59317        | 11.2% | 10697        | 10.1% | 0.04 | 10133        | 10.9% | 10061        | 10.8% | 0.00 |
|                                          | 2013         | 60570        | 11.5% | 10316        | 9.7%  | 0.06 | 9649         | 10.4% | 9640         | 10.3% | 0.00 |
| Rural Residence                          | N (%)        | 81763        | 15.5% | 13996        | 13.2% | 0.07 | 12741        | 13.7% | 12610        | 13.5% | 0.01 |
| Socioeconomic Status                     | 1 - Lowest   | 95324        | 18.0% | 17781        | 16.7% | 0.03 | 15773        | 16.9% | 15740        | 16.9% | 0.00 |
|                                          | 2            | 107315       | 20.3% | 20919        | 19.7% | 0.02 | 18286        | 19.6% | 18295        | 19.6% | 0.00 |
|                                          | 3            | 103899       | 19.7% | 20839        | 19.6% | 0.00 | 18483        | 19.8% | 18493        | 19.8% | 0.00 |
|                                          | 4            | 108027       | 20.4% | 22272        | 20.9% | 0.01 | 19376        | 20.8% | 19506        | 20.9% | 0.00 |
|                                          | 5 - Highest  | 112074       | 21.2% | 24295        | 22.8% | 0.04 | 21279        | 22.8% | 21163        | 22.7% | 0.00 |
|                                          | Missing      | 1772         | 0.3%  | 323          | 0.3%  | 0.08 |              |       |              |       |      |
| Residential status - Long-Term Care      | N (%)        | 16755        | 3.2%  | 2098         | 2.0%  | 0.08 | 2255         | 2.4%  | 1990         | 2.1%  | 0.02 |
| <b>Comorbidities</b>                     |              |              |       |              |       |      |              |       |              |       |      |
| Acute kidney injury                      | N (%)        | 11500        | 2.2%  | 2564         | 2.4%  | 0.01 | 2526         | 2.7%  | 2236         | 2.4%  | 0.02 |
| Acute urinary retention                  | N (%)        | 19682        | 3.7%  | 11988        | 11.3% | 0.29 | 9683         | 10.4% | 9397         | 10.1% | 0.01 |
| Alcoholism                               | N (%)        | 5421         | 1.0%  | 784          | 0.7%  | 0.03 | 739          | 0.8%  | 723          | 0.8%  | 0.00 |
| Anxiety                                  | N (%)        | 2284         | 0.4%  | 506          | 0.5%  | 0.01 | 426          | 0.5%  | 445          | 0.5%  | 0.00 |
| Atrial fibrillation/flutter              | N (%)        | 33939        | 6.4%  | 7018         | 6.6%  | 0.01 | 6764         | 7.3%  | 6157         | 6.6%  | 0.03 |
| Benign Prostatic Hyperplasia             | N (%)        | 123072       | 23.3% | 72375        | 68.0% | 1    | 62977        | 67.6% | 59474        | 63.8% | 0.08 |
| Bipolar Disorder                         | N (%)        | 679          | 0.1%  | 115          | 0.1%  | 0.00 | 115          | 0.1%  | 98           | 0.1%  | 0.00 |
| Cancer                                   | N (%)        | 33583        | 6.4%  | 6849         | 6.4%  | 0.00 | 6480         | 7.0%  | 5977         | 6.4%  | 0.02 |

|                                                                            |        |             |       |            |       |      |             |       |            |       |      |
|----------------------------------------------------------------------------|--------|-------------|-------|------------|-------|------|-------------|-------|------------|-------|------|
| Bowel Cancer                                                               | N (%)  | 12493       | 2.4%  | 2308       | 2.2%  | 0.01 | 2122        | 2.3%  | 2031       | 2.2%  | 0.01 |
| Brain tumor                                                                | N (%)  | 453         | 0.1%  | 94         | 0.1%  | 0.00 | 84          | 0.1%  | 83         | 0.1%  | 0.00 |
| Breast Cancer                                                              | N (%)  | 1921        | 0.4%  | 365        | 0.3%  | 0.02 | 347         | 0.4%  | 324        | 0.3%  | 0.02 |
| Lung Cancer                                                                | N (%)  | 8853        | 1.7%  | 1658       | 1.6%  | 0.01 | 1582        | 1.7%  | 1442       | 1.5%  | 0.02 |
| Melanoma                                                                   | N (%)  | 7792        | 1.5%  | 1772       | 1.7%  | 0.02 | 1551        | 1.7%  | 1572       | 1.7%  | 0.00 |
| Prostate cancer                                                            | N (%)  | 61104       | 11.6% | 13531      | 12.7% | 0.03 | 13602       | 14.6% | 12167      | 13.1% | 0.04 |
| Renal Cancer                                                               | N (%)  | 4619        | 0.9%  | 1146       | 1.1%  | 0.02 | 1251        | 1.3%  | 977        | 1.0%  | 0.03 |
| Chronic kidney disease                                                     | N (%)  | 43161       | 8.2%  | 8853       | 8.3%  | 0.00 | 9246        | 9.9%  | 7819       | 8.4%  | 0.05 |
| Chronic liver disease                                                      | N (%)  | 17923       | 3.4%  | 3692       | 3.5%  | 0.01 | 3344        | 3.6%  | 3202       | 3.4%  | 0.01 |
| Chronic lung disease (including COPD)                                      | N (%)  | 130423      | 24.7% | 27689      | 26.0% | 0.03 | 25306       | 27.2% | 24047      | 25.8% | 0.03 |
| Congestive heart failure                                                   | N (%)  | 61684       | 11.7% | 12260      | 11.5% | 0.01 | 11560       | 12.4% | 10814      | 11.6% | 0.02 |
| Coronary artery disease with angina                                        | N (%)  | 205409      | 38.9% | 41802      | 39.3% | 0.01 | 38074       | 40.9% | 36487      | 39.2% | 0.03 |
| Cranial head trauma                                                        | N (%)  | 11197       | 2.1%  | 2341       | 2.2%  | 0.01 | 2238        | 2.4%  | 2022       | 2.2%  | 0.01 |
| Dementia                                                                   | N (%)  | 48659       | 9.2%  | 9369       | 8.8%  | 0.01 | 9720        | 10.4% | 8354       | 9.0%  | 0.05 |
| Encephalitis/atypical<br>CNS/MSA/PSP/PLS                                   | N (%)  | 62          | 0.0%  | 7          | 0.0%  | 0.01 | 14          | 0.0%  | <6         | 0.0%  | 0.01 |
| Migraine                                                                   | N (%)  | 1507        | 0.3%  | 341        | 0.3%  | 0.00 | 316         | 0.3%  | 273        | 0.3%  | 0.00 |
| MS                                                                         | N (%)  | 1225        | 0.2%  | 257        | 0.2%  | 0.00 | 272         | 0.3%  | 215        | 0.2%  | 0.02 |
| Obesity                                                                    | N (%)  | 23090       | 4.4%  | 4645       | 4.4%  | 0.00 | 4177        | 4.5%  | 4023       | 4.3%  | 0.01 |
| Osteoporosis                                                               | N (%)  | 27394       | 5.2%  | 6889       | 6.5%  | 0.06 | 5941        | 6.4%  | 5880       | 6.3%  | 0.00 |
| Peripheral vascular disease                                                | N (%)  | 11069       | 2.1%  | 1770       | 1.7%  | 0.03 | 1867        | 2.0%  | 1578       | 1.7%  | 0.02 |
| Personality disorder                                                       | N (%)  | 323         | 0.1%  | 46         | 0.0%  | 0.04 | 48          | 0.1%  | 37         | 0.0%  | 0.04 |
| Prior depression                                                           | N (%)  | 16637       | 3.1%  | 3818       | 3.6%  | 0.03 | 3353        | 3.6%  | 3353       | 3.6%  | 0.00 |
| Prior non-depression mental health<br>(schizophrenia, bipolar, anxiety)    | N (%)  | 4096        | 0.8%  | 777        | 0.7%  | 0.01 | 693         | 0.7%  | 683        | 0.7%  | 0.00 |
| Prior self-harm                                                            | N (%)  | 1298        | 0.2%  | 255        | 0.2%  | 0.00 | 191         | 0.2%  | 191        | 0.2%  | 0.00 |
| Rheumatoid arthritis                                                       | N (%)  | 19357       | 3.7%  | 4181       | 3.9%  | 0.01 | 3763        | 4.0%  | 3638       | 3.9%  | 0.01 |
| Schizophrenia/delusional                                                   | N (%)  | 1288        | 0.2%  | 181        | 0.2%  | 0.00 | 178         | 0.2%  | 163        | 0.2%  | 0.00 |
| Seizure                                                                    | N (%)  | 3209        | 0.6%  | 553        | 0.5%  | 0.01 | 597         | 0.6%  | 475        | 0.5%  | 0.01 |
| Stroke or TIA                                                              | N (%)  | 15788       | 3.0%  | 3291       | 3.1%  | 0.01 | 2845        | 3.1%  | 2925       | 3.1%  | 0.00 |
| Substance abuse                                                            | N (%)  | 766         | 0.1%  | 161        | 0.2%  | 0.03 | 144         | 0.2%  | 142        | 0.2%  | 0.00 |
| Superficial head trauma                                                    | N (%)  | 24238       | 4.6%  | 4899       | 4.6%  | 0.00 | 4646        | 5.0%  | 4297       | 4.6%  | 0.02 |
| Urinary tract infection                                                    | N (%)  | 101382      | 19.2% | 38806      | 36.5% | 0.39 | 33957       | 36.4% | 32221      | 34.6% | 0.04 |
| <b>Comorbidities by Medication use in 180 days prior to the index date</b> |        |             |       |            |       |      |             |       |            |       |      |
| Diabetes                                                                   | N (%)  | 112395      | 21.3% | 19293      | 18.1% | 0.08 | 17385       | 18.7% | 17352      | 18.6% | 0    |
| Hypertension                                                               | N (%)  | 314514      | 59.5% | 59727      | 56.1% | 0.07 | 54648       | 58.6% | 52555      | 56.4% | 0.04 |
| <b>Comorbidity Index (based on 3 year lookback window)</b>                 |        |             |       |            |       |      |             |       |            |       |      |
| Charlson comorbidity index                                                 | Mean   | 0.54 (1.24) |       | 0.5 (1.17) |       | 0.03 | 0.56 (1.21) |       | 0.52 (1.2) |       | 0.04 |
|                                                                            | (SD)   |             |       |            |       |      |             |       |            |       |      |
|                                                                            | Median | 0 (0-0)     |       | 0 (0-0)    |       |      | 0 (0-1)     |       | 0 (0-0)    |       |      |
|                                                                            | (IQR)  |             |       |            |       |      |             |       |            |       |      |
|                                                                            | 0      | 403218      | 76.3% | 82197      | 77.2% | 0.02 | 69788       | 74.9% | 71555      | 76.8% | 0.04 |
| 1                                                                          | 47531  | 9.0%        | 9863  | 9.3%       | 0.01  | 8510 | 9.1%        | 8705  | 9.3%       | 0.01  |      |
| 2                                                                          | 39380  | 7.5%        | 7450  | 7.0%       | 0.02  | 8263 | 8.9%        | 6609  | 7.1%       | 0.07  |      |
| 3+                                                                         | 38282  | 7.2%        | 6919  | 6.5%       | 0.03  | 6636 | 7.1%        | 6328  | 6.8%       | 0.01  |      |

| Johns Hopkins ACG Aggregated<br>Diagnosis Groups** | Mean<br>(SD)    | 7.39 (3.67) |       | 8.54 (3.68) |       | 0.31 | 8.53 (3.72) |       | 8.41 (3.69) |       | 0.04 |
|----------------------------------------------------|-----------------|-------------|-------|-------------|-------|------|-------------|-------|-------------|-------|------|
|                                                    | Median<br>(IQR) | 7 (5-10)    |       | 8 (6-11)    |       |      | 8 (6-11)    |       | 8 (6-11)    |       |      |
| 0-4                                                |                 | 124790      | 23.6% | 14645       | 13.8% | 0.25 | 13498       | 14.5% | 13675       | 14.7% | 0.01 |
| 5-9                                                |                 | 259863      | 49.2% | 51297       | 48.2% | 0.02 | 44331       | 47.6% | 45224       | 48.5% | 0.02 |
| 10-14                                              |                 | 123526      | 23.4% | 33780       | 31.7% | 0.19 | 29361       | 31.5% | 28708       | 30.8% | 0.02 |
| 15-19                                              |                 | 19634       | 3.7%  | 6467        | 6.1%  | 0.11 | 5769        | 6.2%  | 5381        | 5.8%  | 0.02 |
| ≥20                                                |                 | 598         | 0.1%  | 240         | 0.2%  | 0.03 | 238         | 0.3%  | 209         | 0.2%  | 0.02 |

**Medication use (in the 180 days prior to the index date)**

|                                                         |       |        |       |       |       |      |       |       |       |       |      |
|---------------------------------------------------------|-------|--------|-------|-------|-------|------|-------|-------|-------|-------|------|
| ACE inhibitors or ARBs                                  | N (%) | 272316 | 51.5% | 50769 | 47.7% | 0.08 | 45255 | 48.6% | 44849 | 48.1% | 0.01 |
| Alpha antagonist (prostate specific)                    | N (%) | 29646  | 5.6%  | 36906 | 34.7% | 0.78 | 23078 | 24.8% | 26396 | 28.3% | 0.08 |
| Alpha antagonist (non-specific)                         | N (%) | 25807  | 4.9%  | 18112 | 17.0% | 0.39 | 14880 | 16.0% | 14244 | 15.3% | 0.02 |
| Androgen deprivation therapy                            | N (%) | 9510   | 1.8%  | 630   | 0.6%  | 0.11 | 886   | 1.0%  | 620   | 0.7%  | 0.03 |
| Antibiotic                                              | N (%) | 149521 | 28.3% | 42635 | 40.1% | 0.25 | 35233 | 37.8% | 35443 | 38.0% | 0    |
| Anticoagulant                                           | N (%) | 5743   | 1.1%  | 1202  | 1.1%  | 0    | 1060  | 1.1%  | 1088  | 1.2%  | 0.01 |
| Anticonvulsants                                         | N (%) | 10286  | 1.9%  | 1955  | 1.8%  | 0.01 | 1883  | 2.0%  | 1738  | 1.9%  | 0.01 |
| Antidepressants (SSRIs, SNRIs)                          | N (%) | 39474  | 7.5%  | 7783  | 7.3%  | 0.01 | 7306  | 7.8%  | 7057  | 7.6%  | 0.01 |
| Antidepressants (Other)                                 | N (%) | 32272  | 6.1%  | 6835  | 6.4%  | 0.01 | 5909  | 6.3%  | 6229  | 6.7%  | 0.02 |
| Antiemetic                                              | N (%) | 11204  | 2.1%  | 2876  | 2.7%  | 0.04 | 2315  | 2.5%  | 2506  | 2.7%  | 0.01 |
| Antineoplastic                                          | N (%) | 20707  | 9.0%  | 2558  | 2.4%  | 0.09 | 2804  | 3.0%  | 2379  | 2.6%  | 0.02 |
| Antiparkinson's Medications                             | N (%) | 9990   | 1.9%  | 2290  | 2.2%  | 0.02 | 2089  | 2.2%  | 2012  | 2.2%  | 0    |
| Antiplatelet                                            | N (%) | 34325  | 6.5%  | 7054  | 6.6%  | 0    | 5899  | 6.3%  | 6309  | 6.8%  | 0.02 |
| Antipsychotics (Atypical)                               | N (%) | 15096  | 2.9%  | 2306  | 2.2%  | 0.04 | 2277  | 2.4%  | 2127  | 2.3%  | 0.01 |
| Antipsychotics (Other)                                  | N (%) | 4398   | 0.8%  | 773   | 0.7%  | 0.01 | 712   | 0.8%  | 687   | 0.7%  | 0.01 |
| Benzodiazepine                                          | N (%) | 61667  | 11.7% | 14116 | 13.3% | 0.05 | 12254 | 13.1% | 12216 | 13.1% | 0    |
| Beta Blockers                                           | N (%) | 165312 | 31.3% | 30341 | 28.5% | 0.06 | 28478 | 30.6% | 26763 | 28.7% | 0.04 |
| Bisphosphonate                                          | N (%) | 27041  | 5.1%  | 6680  | 6.3%  | 0.05 | 5633  | 6.0%  | 5773  | 6.2%  | 0.01 |
| Calcium channel blockers                                | N (%) | 139096 | 26.3% | 27852 | 26.2% | 0.00 | 25139 | 27.0% | 24542 | 26.3% | 0.02 |
| Cholinesterase inhibitors                               | N (%) | 17216  | 3.3%  | 3060  | 2.9%  | 0.02 | 3305  | 3.5%  | 2753  | 3.0%  | 0.03 |
| Coumadin                                                | N (%) | 48129  | 9.1%  | 10006 | 9.4%  | 0.01 | 9476  | 10.2% | 8709  | 9.3%  | 0.03 |
| Digoxin                                                 | N (%) | 17307  | 3.3%  | 3474  | 3.3%  | 0    | 3129  | 3.4%  | 3039  | 3.3%  | 0.01 |
| Glucorticoids                                           | N (%) | 27362  | 5.2%  | 5866  | 5.5%  | 0.01 | 5200  | 5.6%  | 5172  | 5.5%  | 0    |
| Inhaled acetylcholine                                   | N (%) | 34371  | 6.5%  | 7294  | 6.9%  | 0.02 | 6340  | 6.8%  | 6407  | 6.9%  | 0    |
| Inhaled beta-agonist                                    | N (%) | 59884  | 11.3% | 12381 | 11.6% | 0.01 | 11297 | 12.1% | 10860 | 11.7% | 0.01 |
| Inhaled corticosteroid                                  | N (%) | 25962  | 4.9%  | 5462  | 5.1%  | 0.01 | 4913  | 5.3%  | 4815  | 5.2%  | 0    |
| Mood stabilizer                                         | N (%) | 5807   | 1.1%  | 1074  | 1.0%  | 0.01 | 957   | 1.0%  | 943   | 1.0%  | 0.00 |
| Narcotics                                               | N (%) | 81804  | 15.5% | 17981 | 16.9% | 0.04 | 15790 | 16.9% | 15693 | 16.8% | 0    |
| Non-potassium sparing diuretics                         | N (%) | 131761 | 24.9% | 23498 | 22.1% | 0.07 | 22872 | 24.5% | 20787 | 22.3% | 0.05 |
| Nonsteroidal anti-inflammatories<br>(excluding aspirin) | N (%) | 77737  | 14.7% | 16812 | 15.8% | 0.03 | 14482 | 15.5% | 14538 | 15.6% | 0    |
| Overactive bladder medication                           | N (%) | 8375   | 1.6%  | 3395  | 3.2%  | 0.1  | 2983  | 3.2%  | 2855  | 3.1%  | 0.01 |
| Potassium sparing diuretics                             | N (%) | 19927  | 3.8%  | 3500  | 3.3%  | 0.03 | 3405  | 3.7%  | 3067  | 3.3%  | 0.02 |
| Proton Pump Inhibitors                                  | N (%) | 116241 | 22.0% | 25459 | 23.9% | 0.05 | 22981 | 24.7% | 22332 | 24.0% | 0.02 |
| Smoking cessation aid                                   | N (%) | 422    | 0.1%  | 79    | 0.1%  | 0    | 72    | 0.1%  | 75    | 0.1%  | 0    |
| Statins                                                 | N (%) | 263739 | 49.9% | 50111 | 47.1% | 0.06 | 45533 | 48.9% | 44262 | 47.5% | 0.03 |

|                                                                                     |              |             |       |               |       |      |              |       |              |       |      |
|-------------------------------------------------------------------------------------|--------------|-------------|-------|---------------|-------|------|--------------|-------|--------------|-------|------|
| Testosterone replacement                                                            | N (%)        | 2970        | 0.6%  | 708           | 0.7%  | 0.01 | 694          | 0.7%  | 601          | 0.6%  | 0.01 |
| Number of unique DINs                                                               | Mean (SD)    | 6.71 (4.75) |       | 7.48 (5.34)   |       | 0.15 | 7.41 (5.03)  |       | 7.39 (5.37)  |       | 0.00 |
|                                                                                     | Median (IQR) | 6 (3-9)     |       | 6 (4-10)      |       |      | 6 (4-10)     |       | 6 (4-10)     |       |      |
| <b>Hospital and Physician Utilization (in the 365 days prior to the index date)</b> |              |             |       |               |       |      |              |       |              |       |      |
| Number of hospital admissions                                                       | Mean (SD)    | 0.49 (1.00) |       | 0.68 (1.11)   |       | 0.18 | 0.66 (1.20)  |       | 0.65 (1.09)  |       | 0.01 |
|                                                                                     | Median (IQR) | 0 (0-1)     |       | 0 (0-1)       |       |      | 0 (0-1)      |       | 0 (0-1)      |       |      |
|                                                                                     | 0            | 374346      | 70.8% | 63876         | 60.0% | 0.23 | 59134        | 63.5% | 57466        | 61.7% | 0.04 |
|                                                                                     | 1            | 93624       | 17.7% | 25609         | 24.1% | 0.16 | 19623        | 21.1% | 21530        | 23.1% | 0.05 |
|                                                                                     | 2            | 36679       | 6.9%  | 10056         | 9.4%  | 0.09 | 8041         | 8.6%  | 8449         | 9.1%  | 0.02 |
| 3+                                                                                  | 23762        | 4.5%        | 6888  | 6.5%          | 0.09  | 6399 | 6.9%         | 5752  | 6.2%         | 0.03  |      |
| Number of psychiatric hospital admissions                                           | Mean (SD)    | 0.01 (0.10) |       | 0.01 (0.11)   |       | 0    | 0.01 (0.12)  |       | 0.01 (0.11)  |       | 0    |
|                                                                                     | Median (IQR) | 0 (0-0)     |       | 0 (0-0)       |       |      | 0 (0-0)      |       | 0 (0-0)      |       |      |
|                                                                                     | 0            | 525366      | 99.4% | 105683        | 99.3% | 0.01 | 92589        | 99.3% | 92536        | 99.3% | 0    |
|                                                                                     | 1            | 2680        | 0.5%  | 644           | 0.6%  | 0.01 | 518          | 0.6%  | 573          | 0.6%  | 0    |
|                                                                                     | 2            | 278         | 0.1%  | 85            | 0.1%  | 0    | 63           | 0.1%  | 74           | 0.1%  | 0    |
| 3+                                                                                  | 87           | 0.0%        | 17    | 0.0%          | 0     | 27   | 0.0%         | 14    | 0.0%         | 0     |      |
| Number of emergency room visits                                                     | Mean (SD)    | 0.55 (1.31) |       | 0.74 (1.51)   |       | 0.13 | 0.72 (1.70)  |       | 0.72 (1.49)  |       | 0    |
|                                                                                     | Median (IQR) | 0 (0-1)     |       | 0 (0-1)       |       |      | 0 (0-1)      |       | 0 (0-1)      |       |      |
|                                                                                     | 0            | 378034      | 71.5% | 68434         | 64.3% | 0.15 | 61634        | 66.1% | 60660        | 65.1% | 0.02 |
|                                                                                     | 1            | 87605       | 16.6% | 19870         | 18.7% | 0.06 | 17052        | 18.3% | 17192        | 18.4% | 0    |
|                                                                                     | 2            | 32539       | 6.2%  | 8746          | 8.2%  | 0.08 | 6984         | 7.5%  | 7457         | 8.0%  | 0.02 |
| 3+                                                                                  | 30233        | 5.7%        | 9373  | 8.8%          | 0.12  | 7527 | 8.1%         | 7888  | 8.5%         | 0.01  |      |
| Number of family physician visits                                                   | Mean (SD)    | 8.55 (8.78) |       | 10.05 (10.12) |       | 0.16 | 10.03 (9.92) |       | 9.87 (10.08) |       | 0.02 |
|                                                                                     | Median (IQR) | 6 (3-11)    |       | 7 (4-12)      |       |      | 7 (4-13)     |       | 7 (4-12)     |       |      |
| Number of family physician mental health visits                                     | Mean (SD)    | 0.22 (1.06) |       | 0.27 (1.17)   |       | 0.04 | 0.26 (1.09)  |       | 0.26 (1.11)  |       | 0    |
|                                                                                     | Median (IQR) | 0 (0-0)     |       | 0 (0-0)       |       |      | 0 (0-0)      |       | 0 (0-0)      |       |      |
| Number of Geriatrician visits                                                       | Mean (SD)    | 0.09 (1.02) |       | 0.17 (1.64)   |       | 0.06 | 0.12 (1.21)  |       | 0.17 (1.68)  |       | 0.04 |
|                                                                                     | Median (IQR) | 0 (0-0)     |       | 0 (0-0)       |       |      | 0 (0-0)      |       | 0 (0-0)      |       |      |
| Number of Neurologist visits                                                        | Mean (SD)    | 0.12 (0.85) |       | 0.18 (1.1)    |       | 0.06 | 0.16 (0.92)  |       | 0.17 (1.07)  |       | 0.01 |
|                                                                                     | Median (IQR) | 0 (0-0)     |       | 0 (0-0)       |       |      | 0 (0-0)      |       | 0 (0-0)      |       |      |
| Number of Psychiatry visits                                                         | Mean (SD)    | 0.15 (1.92) |       | 0.19 (2.46)   |       | 0.02 | 0.18 (2.30)  |       | 0.19 (2.32)  |       | 0.01 |
|                                                                                     | Median (IQR) | 0 (0-0)     |       | 0 (0-0)       |       |      | 0 (0-0)      |       | 0 (0-0)      |       |      |
| Number of urologist visits                                                          | Mean (SD)    | 0.47 (1.53) |       | 1.38 (2.13)   |       | 0.49 | 1.23 (2.55)  |       | 1.21 (1.91)  |       | 0.01 |
|                                                                                     | Median (IQR) | 0 (0-0)     |       | 1 (0-2)       |       |      | 0 (0-2)      |       | 0 (0-2)      |       |      |
| <b>Medical Investigations and Procedures</b>                                        |              |             |       |               |       |      |              |       |              |       |      |
| Bone mineral density test                                                           | N (%)        | 20156       | 3.8%  | 5275          | 5.0%  | 0.06 | 4311         | 4.6%  | 4495         | 4.8%  | 0.01 |
| Bone scan                                                                           | N (%)        | 13119       | 2.5%  | 2979          | 2.8%  | 0.02 | 3440         | 3.7%  | 2564         | 2.8%  | 0.05 |
| Cardiac catheterization                                                             | N (%)        | 10613       | 2.0%  | 2204          | 2.1%  | 0.01 | 1677         | 1.8%  | 1949         | 2.1%  | 0.02 |

|                         |       |        |       |       |       |      |       |       |       |       |      |
|-------------------------|-------|--------|-------|-------|-------|------|-------|-------|-------|-------|------|
| Cardiac stress test     | N (%) | 63508  | 12.0% | 14437 | 13.6% | 0.05 | 12342 | 13.2% | 12487 | 13.4% | 0.01 |
| Carotidendarterectomy   | N (%) | 494    | 0.1%  | 101   | 0.1%  | 0    | 87    | 0.1%  | 91    | 0.1%  | 0    |
| Carotid ultrasound      | N (%) | 25083  | 4.7%  | 5999  | 5.6%  | 0.04 | 5122  | 5.5%  | 5230  | 5.6%  | 0    |
| Chest x-ray             | N (%) | 163067 | 30.9% | 38053 | 35.8% | 0.1  | 33657 | 36.1% | 32924 | 35.3% | 0.02 |
| CT head                 | N (%) | 37024  | 7.0%  | 9613  | 9.0%  | 0.07 | 8414  | 9.0%  | 8298  | 8.9%  | 0    |
| CT spine                | N (%) | 7121   | 1.3%  | 1977  | 1.9%  | 0.05 | 1594  | 1.7%  | 1718  | 1.8%  | 0.01 |
| Echocardiography        | N (%) | 91549  | 17.3% | 21512 | 20.2% | 0.07 | 17958 | 19.3% | 18853 | 20.2% | 0.02 |
| ECT                     | N (%) | 111    | 0.0%  | 39    | 0.0%  | 0.07 | 29    | 0.0%  | 31    | 0.0%  | 0.02 |
| EEG                     | N (%) | 2451   | 0.5%  | 703   | 0.7%  | 0.03 | 590   | 0.6%  | 608   | 0.7%  | 0.01 |
| Heart valve replacement | N (%) | 793    | 0.2%  | 185   | 0.2%  | 0    | 156   | 0.2%  | 154   | 0.2%  | 0    |
| Holter monitoring       | N (%) | 30489  | 5.8%  | 7885  | 7.4%  | 0.06 | 6417  | 6.9%  | 6870  | 7.4%  | 0.02 |
| MRI head                | N (%) | 9812   | 1.9%  | 2478  | 2.3%  | 0.05 | 2140  | 2.3%  | 2153  | 2.3%  | 0    |
| MRI spine               | N (%) | 8081   | 1.5%  | 2262  | 2.1%  | 0.05 | 1835  | 2.0%  | 1983  | 2.1%  | 0.01 |
| PSA test                | N (%) | 40309  | 7.6%  | 15932 | 15.0% | 0.24 | 13489 | 14.5% | 14068 | 15.1% | 0.02 |
| Pulmonary function test | N (%) | 45071  | 8.5%  | 10441 | 9.8%  | 0.05 | 9051  | 9.7%  | 9012  | 9.7%  | 0    |
| TRUS biopsy             | N (%) | 5840   | 1.1%  | 6858  | 6.4%  | 0.28 | 4330  | 4.6%  | 4814  | 5.2%  | 0.03 |
| TURP                    | N (%) | 3551   | 0.7%  | 997   | 0.9%  | 0.02 | 1132  | 1.2%  | 934   | 1.0%  | 0.02 |
| Urine culture           | N (%) | 74635  | 14.1% | 34650 | 32.6% | 0.45 | 27737 | 29.8% | 27551 | 29.6% | 0    |

\*Standardized differences (SD) describe differences in between group means relative to a pooled standard deviation, and better demonstrate significant differences in large samples. A SD > 10% is considered a meaningful difference between groups.

\*\*We used the Adjusted Clinical Group (ACG) scoring system to score comorbidity. The ACG is a population/patient case-mix adjustment system that provides a relative measure of the individual's expected consumption of health services. ICD-9/ICD-9-CM codes are categorized into 32 groups, called Ambulatory Diagnostic Groups (ADGs), based on clinical similarity, chronicity, likelihood of requiring specialty care, and disability. These groups are further reduced to 12 'Collapsed ADGs' or CADGs. Reference: The Johns Hopkins University Bloomberg School of Public Health, Health Services Research & Development Center. The Johns Hopkins ACG® Case-Mix System Version 10.0 Release Notes. (Editor in Chief: Jonathan P. Weiner). The Johns Hopkins University. 2011.



**eTable 6.** 5ARI medication utilisation details among the exposed cohort.

|                                                                                       | <b>Finasteride</b>                  | <b>Dutasteride</b>                 |
|---------------------------------------------------------------------------------------|-------------------------------------|------------------------------------|
| Number (%)                                                                            | 44692 (48.0%)                       | 48505 (52.0%)                      |
| Median duration of use, years (IQR)                                                   | 1.02 (0.23-3.58)                    | 0.92 (0.22-2.70)                   |
| Number (%) of men that switched at least once to the other 5ARI during continuous use | 2559 (5.7%) switched to dutasteride | 938 (1.9%) switched to finasteride |
| Physician speciality initiating the 5ARI prescription                                 |                                     |                                    |
| Urology                                                                               | 15358 (34.4%)                       | 23096 (47.6%)                      |
| Family physician                                                                      | 22087 (49.4%)                       | 18994 (39.2%)                      |
| Other                                                                                 | 7247(16.2%)                         | 6415 (13.2%)                       |

**eTable 7.** Significance of the potential effect modifiers of prior depression, and recent use of antidepressants on suicide between our matched cohorts of 5ARI users and non-users. Prior self-harm was such a rare event that the model could be fit. The interaction p-value indicates whether there is a significant difference in suicide based on these subgroups.

|                                      | Events/Number at Risk (%)      |                                      | Hazard Ratio         | P value for interaction |
|--------------------------------------|--------------------------------|--------------------------------------|----------------------|-------------------------|
|                                      | 5ARI users<br>(Exposed cohort) | Non-5ARI users<br>(Unexposed cohort) |                      |                         |
| <b>Prior depression</b>              |                                |                                      |                      |                         |
| Yes                                  | */3353                         | */3353                               | 2.00 (0.37 to 10.92) | 0.32                    |
| No                                   | */89844                        | */89844                              | 0.81 (0.48 to 1.37)  |                         |
| <b>Recent use of antidepressants</b> |                                |                                      |                      |                         |
| Yes                                  | 11/11882(0.09%)                | 7/11882(0.06%)                       | 1.14 (0.41 to 3.15)  | 0.56                    |
| No                                   | 27/81315(0.03%)                | 29/81315(0.04%)                      | 0.81 (0.45 to 1.44)  |                         |

\*Individual numbers were not included for prior depression due to privacy regulations forbidding the reporting of any groups numbering less than 6.

**eTable 8.** Risk of suicide, self-harm and depression among men exposed to 5ARI medications compared to matched unexposed men after excluding matched pairs with evidence of prostate cancer.

|                 | Death by suicide<br>(primary outcome) |                                    | Self-Harm<br>(secondary outcome)                                                                                                                                           |                                    | Depression<br>(secondary outcome)                                                                                  |                                    |
|-----------------|---------------------------------------|------------------------------------|----------------------------------------------------------------------------------------------------------------------------------------------------------------------------|------------------------------------|--------------------------------------------------------------------------------------------------------------------|------------------------------------|
|                 | 5ARI users<br><i>n</i> =69,699        | Non-5ARI users<br><i>n</i> =69,699 | 5ARI users<br><i>n</i> =69,699                                                                                                                                             | Non-5ARI users<br><i>n</i> =69,699 | 5ARI users<br><i>n</i> =67,148*                                                                                    | Non-5ARI users<br><i>n</i> =67,148 |
| HR              | 0.92 (0.51-1.64, <i>p</i> =0.77)      | Reference                          | NA                                                                                                                                                                         | NA                                 | NA                                                                                                                 | NA                                 |
| Stratified HR** |                                       |                                    | <u>0-1.5 years</u><br>1.95 (1.32-2.88, <i>p</i> <0.01)<br><u>1.5-3 years</u><br>0.57 (0.29-1.12, <i>p</i> =0.57)<br><u>&gt;3 years</u><br>1.11 (0.59-2.10, <i>p</i> =0.75) | Reference                          | <u>0-1.5 years</u><br>2.02 (1.77-2.30, <i>p</i> <0.01)<br><u>&gt;1.5 years</u><br>1.21 (1.05-1.39, <i>p</i> =0.01) | Reference                          |

\*Matched pairs with a prior history of depression were excluded from the cohort for this analysis.

\*\*The secondary outcomes of self-harm and depression did not meet the assumption for proportional hazards, and as such the results were stratified by followup time. The overall HR in these cases represents an average HR over the entire followup period, and the stratified HR better represent the magnitude of risk associated with the specific time periods after 5ARI initiation.

**eTable 9.** Risk of suicide, self-harm and depression among men exposed to 5ARI medications compared to matched unexposed men, with adjustment for the competing risk of non-suicide mortality.

|                 | Death by suicide<br>(primary outcome) |                                       | Self-Harm<br>(secondary outcome)                                                                                                                                                   |                                       | Depression<br>(secondary outcome)                                                                                        |                                       |
|-----------------|---------------------------------------|---------------------------------------|------------------------------------------------------------------------------------------------------------------------------------------------------------------------------------|---------------------------------------|--------------------------------------------------------------------------------------------------------------------------|---------------------------------------|
|                 | 5ARI users<br><i>n</i> =93,197        | Non-5ARI<br>users<br><i>n</i> =93,197 | 5ARI users<br><i>n</i> =93,197                                                                                                                                                     | Non-5ARI<br>users<br><i>n</i> =93,197 | 5ARI users<br><i>n</i> =89,844*                                                                                          | Non-5ARI<br>users<br><i>n</i> =89,844 |
| HR              | 1.06 (0.77-<br>1.46, <i>p</i> =0.74)  | Reference                             | NA                                                                                                                                                                                 | NA                                    | NA                                                                                                                       | NA                                    |
| Stratified HR** |                                       |                                       | <u>0-1.5 years</u><br>1.89 (1.48-2.41,<br><i>p</i> <0.01)<br><u>1.5-3 years</u><br>0.74 (0.52-1.07,<br><i>p</i> =0.11)<br><u>&gt;3 years</u><br>1.00 (0.73-1.36,<br><i>p</i> =1.0) | Reference                             | <u>0-1.5 years</u><br>1.90 (1.75-2.05,<br><i>p</i> <0.01)<br><u>&gt;1.5 years</u><br>1.09 (1.01-1.17,<br><i>p</i> =0.03) | Reference                             |

\*Matched pairs with a prior history of depression were excluded from the cohort for this analysis.

\*\*The secondary outcomes of self-harm and depression did not meet the assumption for proportional hazards, and as such the results were stratified by followup time. The overall HR in these cases represents an average HR over the entire followup period, and the stratified HR better represent the magnitude of risk associated with the specific time periods after 5ARI initiation.

**eResults.** Example of SAS code used for primary analysis, and resulting raw output from SAS model.

```
proc phreg data=ari.outcomes;
  model suicide_fup*suicide(0) = exposure;
  strata pair;
  hazardratio exposure;
run;
```

The PHREG Procedure

| Model Information  |                |
|--------------------|----------------|
| Data Set           | ARI.OUTCOME133 |
| Dependent Variable | suicide_fup    |
| Censoring Variable | suicide        |
| Censoring Value(s) | 0              |
| Ties Handling      | BRESLOW        |

|                             |        |
|-----------------------------|--------|
| Number of Observations Read | 186394 |
| Number of Observations Used | 186394 |

| Summary of the Number of Event and Censored Values |        |       |          |         |
|----------------------------------------------------|--------|-------|----------|---------|
| Stratum pair                                       | Total  | Event | Censored | Percent |
| Total                                              | 186394 | 74    | 186320   | 99.96   |

| Convergence Status                            |  |
|-----------------------------------------------|--|
| Convergence criterion (GCONV=1E-8) satisfied. |  |

| Model Fit Statistics |                    |                 |
|----------------------|--------------------|-----------------|
| Criterion            | Without Covariates | With Covariates |
| -2 LOG L             | 85.950             | 85.692          |
| AIC                  | 85.950             | 87.692          |
| SBC                  | 85.950             | 89.996          |

| Testing Global Null Hypothesis: BETA=0 |            |    |            |
|----------------------------------------|------------|----|------------|
| Test                                   | Chi-Square | DF | Pr > ChiSq |
| Likelihood Ratio                       | 0.2582     | 1  | 0.6113     |

| Testing Global Null Hypothesis: BETA=0 |            |    |            |
|----------------------------------------|------------|----|------------|
| Test                                   | Chi-Square | DF | Pr > ChiSq |
| Score                                  | 0.2581     | 1  | 0.6115     |
| Wald                                   | 0.2577     | 1  | 0.6117     |

| Analysis of Maximum Likelihood Estimates |    |                    |                |            |            |              |
|------------------------------------------|----|--------------------|----------------|------------|------------|--------------|
| Parameter                                | DF | Parameter Estimate | Standard Error | Chi-Square | Pr > ChiSq | Hazard Ratio |
| exposure                                 | 1  | -0.12921           | 0.25453        | 0.2577     | 0.6117     | 0.879        |

| Hazard Ratios for exposure |                |                            |       |
|----------------------------|----------------|----------------------------|-------|
| Description                | Point Estimate | 95% Wald Confidence Limits |       |
| exposure Unit=1            | 0.879          | 0.534                      | 1.447 |

**eFigure 1.** Cohort flow chart. The large number of patients excluded from the unexposed cohort are a result of a large number of men dying prior to their randomly assigned index date. Similarly, a large number of men were not over 66 years of age, and therefore were excluded because they did not have a prescription in ODB in the 90 days prior to the index date.

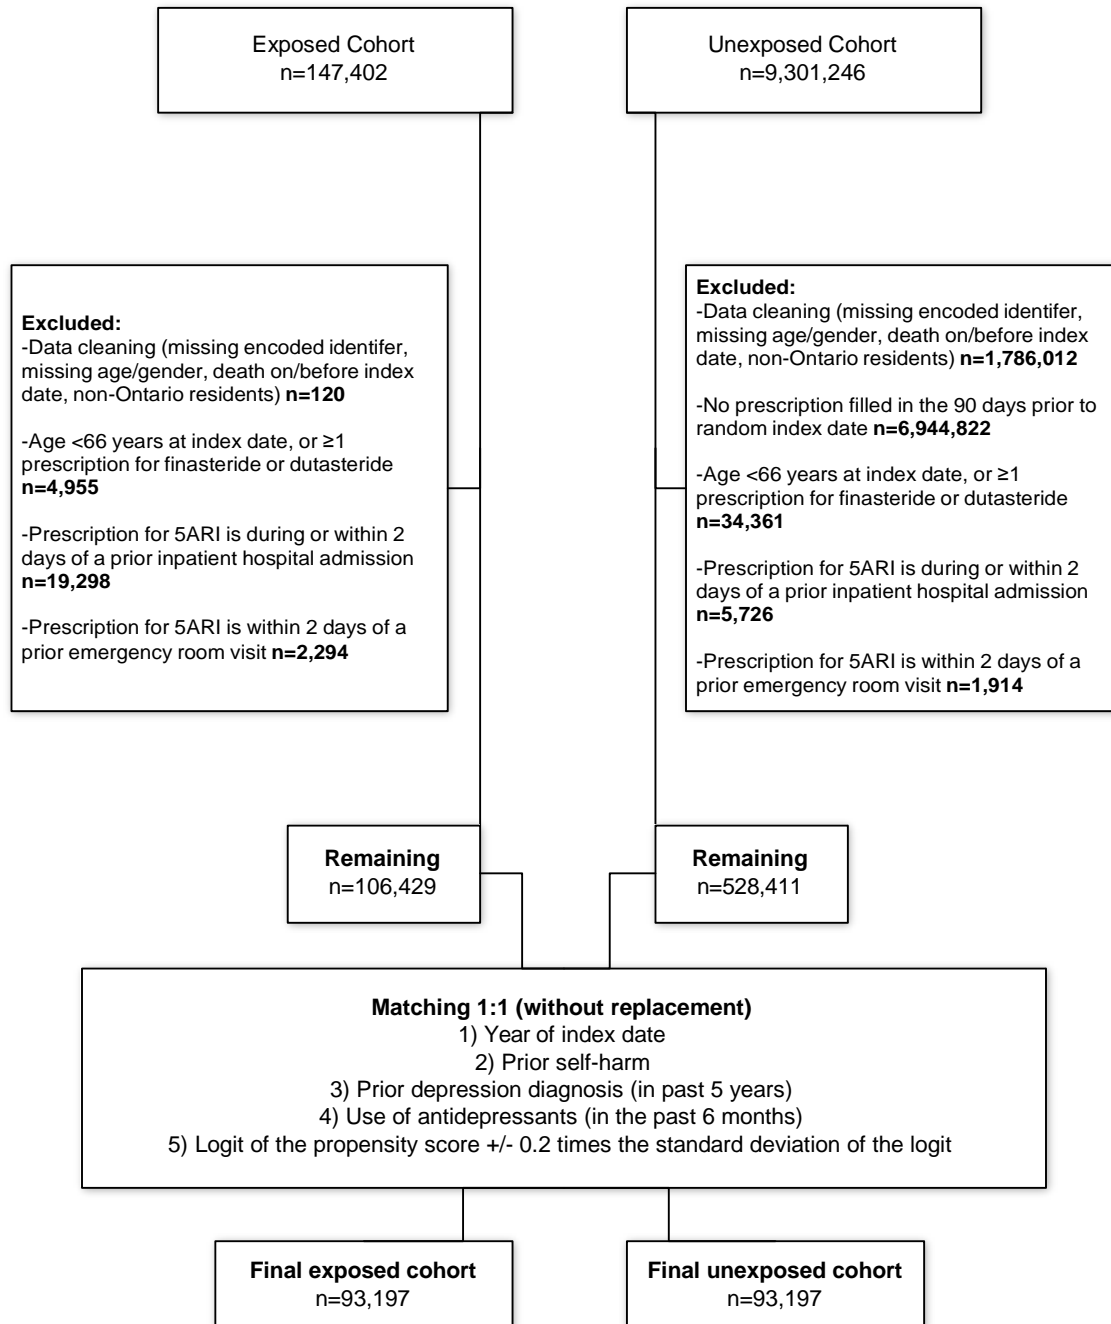

**eFigure 2.** Graph of Schoenfeld residuals for suicide, self-harm, and depression. Significant deviation of the plotted line (shown with 95% confidence intervals) from the straight dotted line at 0 on the y axis indicates a violation of the proportionality assumption. The statistical test for violation of the proportionality assumption (p value of a time varying covariate) is also included.

A) Suicide ( $p=0.54$ , suggesting no significant deviation from proportionality).

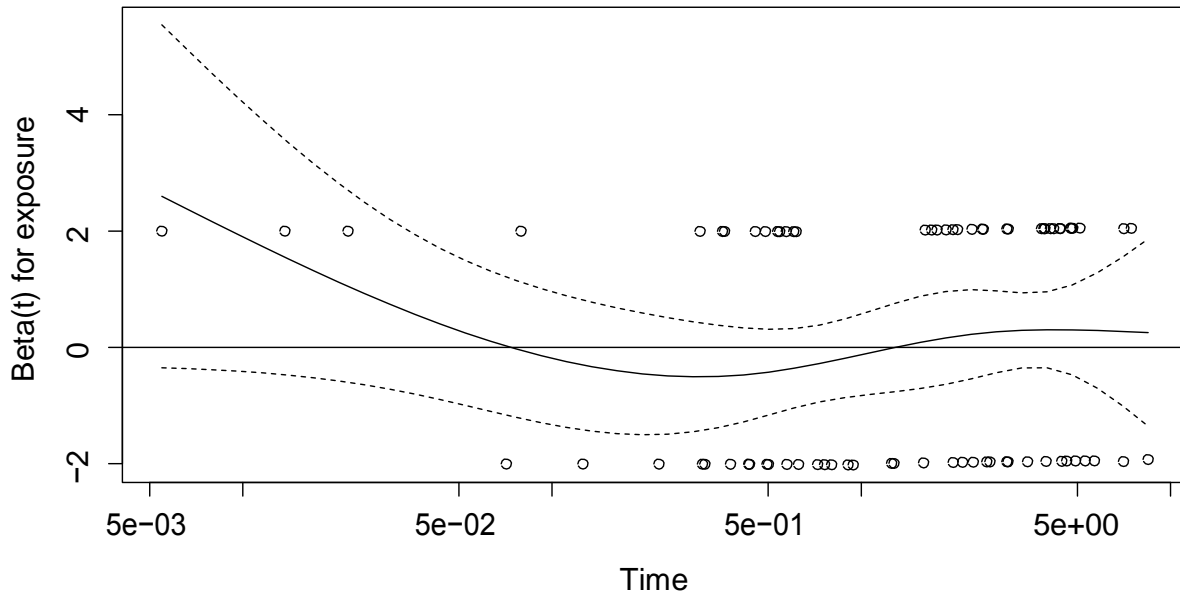

B) Self-harm ( $p<0.05$ , suggesting a significant deviation from proportionality).

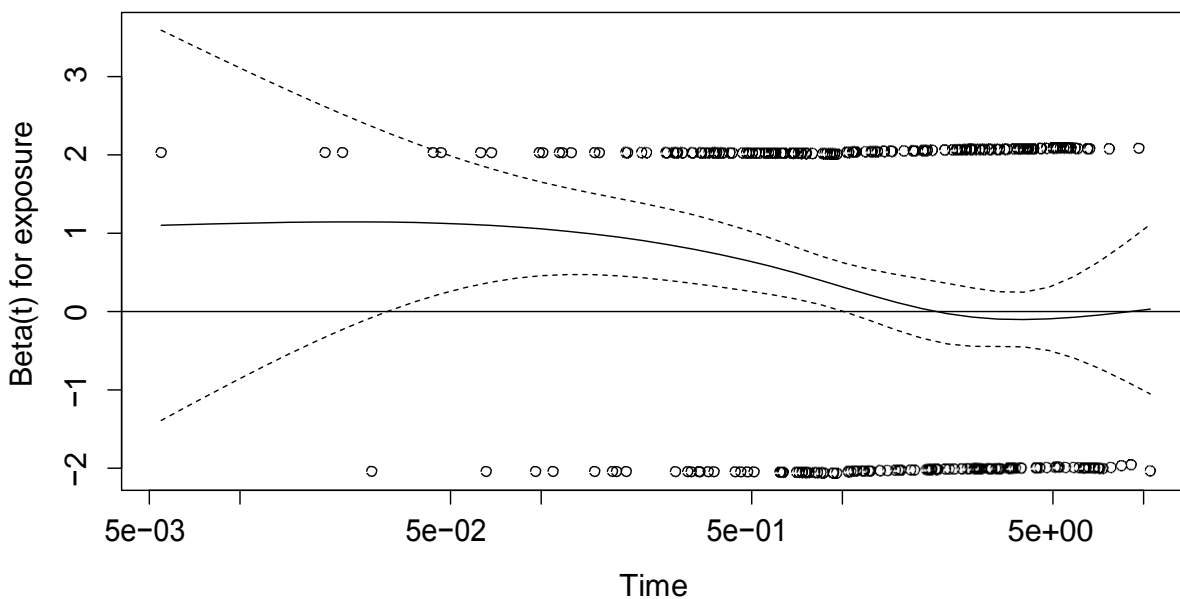

C) Depression ( $p<0.05$ , suggesting a significant deviation from proportionality).



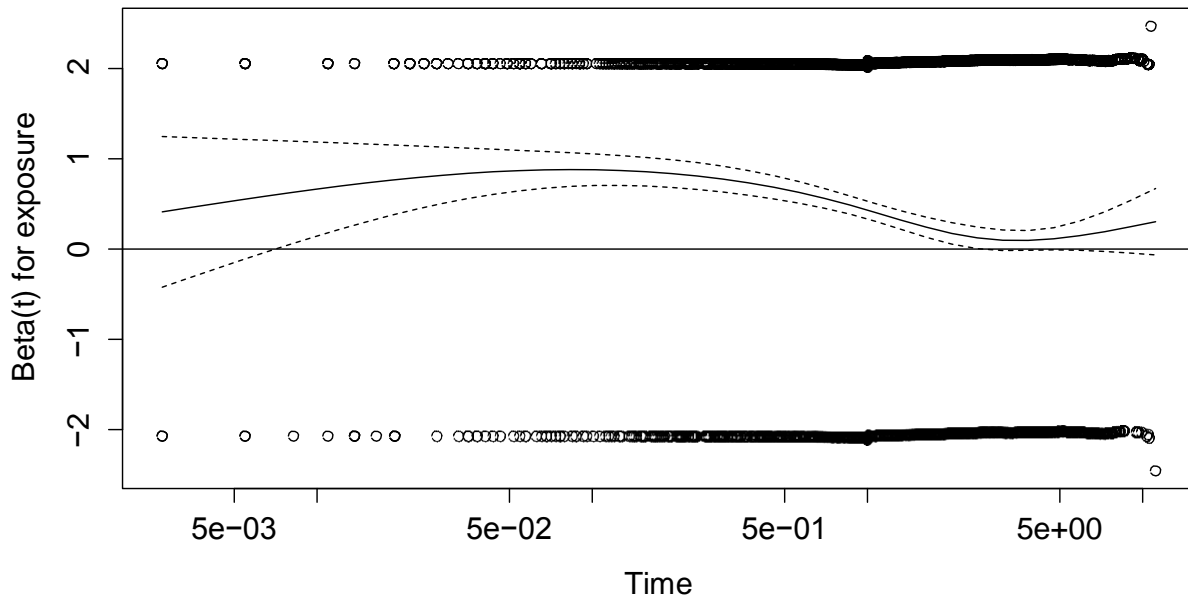

**eFigure 3.** Kaplan meier graphs of self-harm and depression.

A) Self-harm

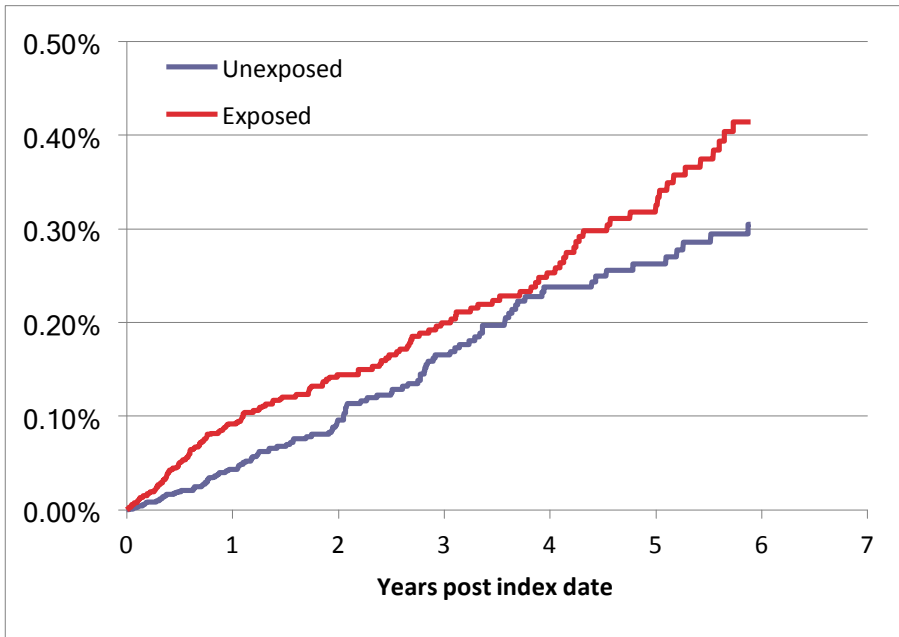

B) Depression

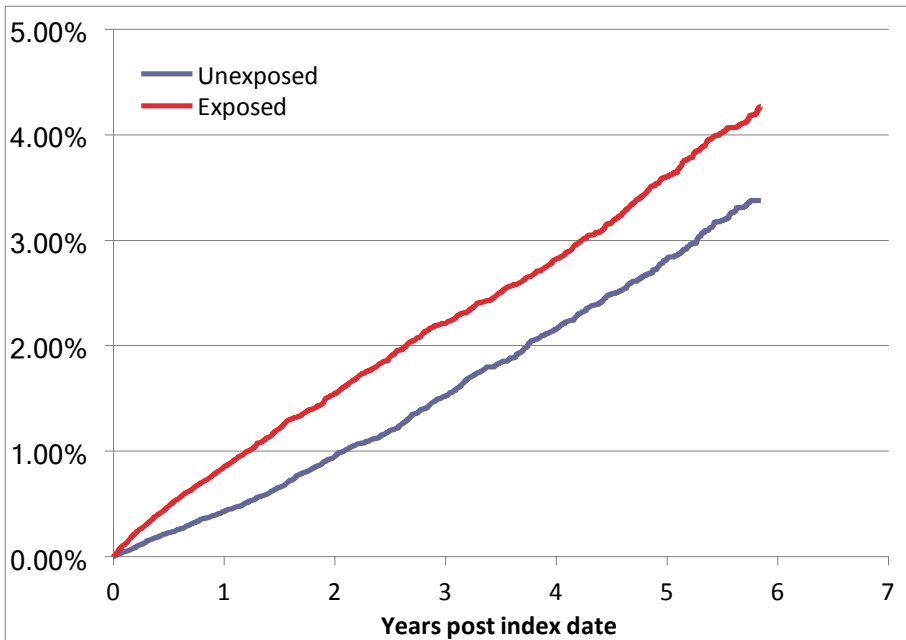

Supplement: jamainternmed-177-683-s002.pdf [file jamainternmed-177-683-s002.pdf]
